1 **Bases of antisense lncRNA-associated regulation of gene expression in fission yeast**

2

3 Maxime Wery<sup>1,3</sup>, Camille Gautier<sup>1</sup>, Marc Describes<sup>1</sup>, Mayuko Yoda<sup>1</sup>, Valérie Migeot<sup>2</sup>, Damien

4 Hermand<sup>2</sup> and Antonin Morillon<sup>1,3</sup>

5

6 <sup>1</sup> ncRNA, epigenetic and genome fluidity, Institut Curie, PSL Research University, CNRS UMR 3244,

7 Université Pierre et Marie Curie, 26 rue d'Ulm, 75248 Paris Cedex 05, France

8 <sup>2</sup> URPHYM, Namur Research College (NARC), University of Namur, Namur 5000, Belgium

9 <sup>3</sup> Corresponding authors

10

11 **Running title:** Transcription regulation by aslncRNA in *S. pombe*

12

13 **Keywords:** antisense lncRNA/*ctt1*/Exo2/NET-Seq/XUT/*S. pombe*

14

15 **ABSTRACT**

16           Antisense (as)lncRNAs can regulate gene expression but the underlying mechanisms and the  
17 different cofactors involved remain unclear. Using Native Elongating Transcript sequencing, here we  
18 show that stabilization of antisense Exo2-sensitive lncRNAs (XUTs) results in the attenuation, at the  
19 nascent transcription level, of a subset of highly expressed genes displaying prominent promoter-  
20 proximal nucleosome depletion and histone acetylation. Mechanistic investigations on the catalase  
21 gene *ctt1* revealed that its induction following oxidative stress is impaired in Exo2-deficient cells,  
22 correlating with the accumulation of an asXUT. Interestingly, expression of this asXUT was also  
23 activated in wild-type cells upon oxidative stress, concomitant to *ctt1* induction, indicating a  
24 potential attenuation feedback. This attenuation correlates with asXUT abundance, it is  
25 transcriptional, characterized by low RNAPII-ser5 phosphorylation, and it requires an histone  
26 deacetylase activity and the conserved Set2 histone methyltransferase. Finally, we identified Dicer as  
27 another RNA processing factor acting on *ctt1* induction, but independently of Exo2. We propose that  
28 asXUTs could modulate the expression of their paired-sense genes when it exceeds a critical  
29 threshold, using a conserved mechanism independent of RNAi.

30

31 **AUTHOR SUMMARY**

32           Examples of regulatory antisense (as)lncRNAs acting on gene expression have been reported  
33 in multiple model organisms. However, despite their regulatory importance, aslncRNAs have been  
34 poorly studied, and the molecular bases for aslncRNAs-mediated regulation remain incomplete. One  
35 reason for the lack of global information on aslncRNAs appears to be their low cellular abundance.  
36 Indeed, our previous studies in budding and fission yeasts revealed that aslncRNAs are actively  
37 degraded by the Xrn1/Exo2-dependent cytoplasmic 5'-3' RNA decay pathway. Using a combination of  
38 single-gene and genome-wide analyses in fission yeast, here we report that the stabilization of a set  
39 of Exo2-sensitive aslncRNAs correlates with attenuation of paired-sense genes transcription. Our  
40 work provides fundamental insights into the mechanism by which aslncRNAs could regulate gene  
41 expression. It also highlights for the first time that the level of sense gene transcription and the  
42 presence of specific chromatin features could define the potential of aslncRNA-mediated  
43 attenuation, raising the idea that aslncRNAs only attenuate those genes with expression levels above  
44 a "*regulatory threshold*". This opens novel perspectives regarding what the potential determinants of  
45 aslncRNA-dependent regulation, as previous models in budding yeast rather proposed that  
46 aslncRNA-mediated repression is restricted to lowly expressed genes.

47

## 48 INTRODUCTION

49 Eukaryotic genomes are pervasively transcribed [1], generating plenty of non-coding (nc)  
50 transcripts, distinct from the housekeeping rRNAs, tRNAs and sn(o)RNAs, and that are arbitrarily  
51 classified into small (< 200 nt) and long ( $\geq$  200 nt) ncRNAs [2,3].

52 Long (l)ncRNAs are produced by RNA polymerase II (RNAPII), capped and polyadenylated, yet  
53 lack protein-coding potential [4,5], although this last point is subject to exceptions [6].

54 Several lines of evidence suggest that they are functionally important. First, lncRNAs show  
55 tissue-specific expression [7] and respond to diverse stimuli, such as oxidative stress [8], suggesting  
56 that their expression is precisely controlled. Second, several lncRNAs are misregulated in diseases  
57 including cancer and neurological disorders [9,10,11]. Furthermore, there is a growing repertoire of  
58 cellular processes in which lncRNAs play important roles, including X-chromosome inactivation,  
59 imprinting, maintenance of pluripotency and transcriptional regulation [12,13].

60 Several classes of lncRNAs have been described [2]. Among them, large intervening non-  
61 coding (linc)RNAs, which result from transcription of intergenic regions, have attracted a lot of  
62 attention as being involved in *cis*- and *trans*-regulation, mostly at the chromatin level, of genes  
63 important for development and cancer [13].

64 Another class of lncRNAs consists of antisense transcripts, that are produced from DNA  
65 strand antisense to genes [14]. Several examples of regulatory antisense (as)lncRNAs acting on sense  
66 gene expression in *cis* or in *trans* have been described in the budding yeast *Saccharomyces cerevisiae*  
67 [15,16,17,18,19,20,21], in the fission yeast *Schizosaccharomyces pombe* [22,23,24], in plant [25] and  
68 in mammalian cells [26,27].

69 Our previous studies in budding and fission yeasts revealed that aslncRNAs are globally  
70 unstable and are mainly targeted by the cytoplasmic 5'-3' RNA decay pathway dependent on the  
71 Xrn1 and Exo2 exoribonucleases in *S. cerevisiae* [28,29] and *S. pombe* [30], respectively. Inactivation  
72 of Xrn1/Exo2 leads to the stabilization of a family of lncRNAs, referred to as Xrn1-sensitive Unstable  
73 Transcripts (XUTs), the majority of which are antisense to protein-coding genes [28,29,30].

74 Interestingly, in *S. cerevisiae*, we defined among these antisense (as)XUTs a subgroup for which the  
75 sense-paired genes (referred to as class 1) undergo antisense-mediated transcriptional silencing [28].  
76 However, the molecular mechanism by which asXUTs could regulate sense gene expression remains  
77 largely unknown to date, still interrogating whether sense transcription is impaired at the initiation  
78 and/or elongation and/or termination stages, whether any post-transcriptional event is in play, and  
79 whether the epigenetic landscape contributes in the regulatory determinants. In addition, such a  
80 transcriptional aslncRNA-mediated regulation has not been documented yet in *S. pombe*.

81 Here we used Native Elongating Transcript sequencing (NET-Seq) to identify genome-wide in  
82 fission yeast the genes attenuated at the nascent transcription level upon stabilization of their  
83 paired-asXUTs. This so-called class 1 corresponds to highly transcribed genes, displaying marks of  
84 active transcription at the chromatin level. Mechanistic investigation on a model class 1  
85 representative, the inducible catalase-coding gene *ctt1*, confirmed that it is transcriptionally  
86 attenuated upon oxidative stress when its paired-asXUT is stabilized, and the level of the attenuation  
87 correlates with the abundance of the asXUT. The attenuation is characterized by low RNAPII Ser5-  
88 phosphorylation (Ser5-P) and requires histone deacetylase (HDAC) activity and the conserved Set2  
89 histone methyltransferase (HMT). Finally, we identified Dicer as an additional regulator of *ctt1*  
90 induction, acting independently of Exo2 and the asXUT. Together, our data support a model where  
91 asXUTs could modulate the expression of the paired-sense genes when it exceeds a critical threshold,  
92 using a conserved mechanism independent of RNAi.

93

94 **RESULTS**

95 **Genome-wide identification of class 1 genes in fission yeast**

96 In budding yeast, stabilization of asXUTs results into the attenuation, at the transcriptional  
97 level, of a subset of paired-sense genes, which are referred to as class 1 [28]. We recently annotated  
98 XUTs in fission yeast [30]. We observed that asXUTs accumulation correlates with down-regulation of  
99 the paired-sense mRNAs, at the RNA level [30], suggesting that the regulatory potential of asXUTs  
100 has been conserved across the yeast clade. However, whether this regulation occurs at the level of  
101 transcription in fission yeast remains unclear.

102 To define class 1 in *S. pombe*, we performed NET-Seq in WT and *exo2*Δ cells. Although global  
103 mRNA synthesis was found to be unchanged upon *exo2* inactivation (S1A Fig), differential expression  
104 analysis discriminated genes for which transcription in *exo2*Δ was significantly reduced (classes 1 & 2,  
105 n=723) or not (classes 3 & 4, n=4405). Within each category, we distinguished genes with (classes 1 &  
106 3) or without (classes 2 & 4) asXUTs (Figs 1A-B; lists in S1-4 Tables).

107 Among the 723 genes transcriptionally attenuated in *exo2*Δ, 175 have asXUTs (class 1).  
108 Despite the proportion of class 1 genes among the attenuated genes is limited (24.2%), it is  
109 significantly higher than expected if presence of asXUT and sense gene attenuation were  
110 independent (Chi-square test,  $P = 0.03$ ), suggesting that the attenuation could depend on the  
111 stabilized asXUTs, at least in some cases. On the other hand, the transcriptional down-regulation of  
112 class 2 (no asXUT) is likely to be an indirect effect reflecting the slow growth phenotype of the  
113 *exo2*Δ mutant [31]. Consistently, class 2 is significantly enriched for GO terms “ribosome biogenesis”  
114 ( $P=1.36e^{-08}$ ) and “cellular component biogenesis ( $P= 1.04e^{-02}$ ), and it is known that the expression of  
115 genes involved in these biological processes directly depends on the growth rate [32]. Altogether,  
116 these observations suggest that for a subgroup of genes, stabilization of the asXUT might contribute  
117 to attenuate transcription of the paired-sense gene.

118 Both classes 1 and 3 have asXUTs, but only class 1 is transcriptionally attenuated upon  
119 asXUTs stabilization. This suggests the existence of specificities discriminating the two classes.

120 Indeed, in WT cells, class 1 is transcribed to higher levels than class 3 (Fig 1C), the latter actually  
121 showing the lowest transcription levels among the four classes (S1B Fig). In *exo2Δ*, transcription of  
122 class 1 falls to the low, basal level of class 3 (Fig 1D). Notably, transcription of XUTs antisense to class  
123 1 and 3 genes is globally unaffected in the *exo2Δ* mutant (S1C Fig), indicating that XUTs accumulation  
124 in this context is due to the inactivation of their decay and not to a global increase of their synthesis  
125 (Fig 1E).

126 We also noted that in WT cells, the nascent antisense transcription signal surrounding the  
127 TSS of class 1 genes is higher than for class 3 (S1D Fig), suggesting that sense TSS overlap could  
128 constitute a factor for the potential regulatory activity of the XUTs antisense to class 1 genes.

129 At the chromatin level, class 1 shows a more pronounced nucleosome depletion in the TSS-  
130 proximal region than class 3 (S1E Fig), higher H3K14 (S1F Fig) and H4K5/8/12/16 acetylation (Fig 1F).  
131 When compared to the four classes, the levels of histone acetylation at the TSS-proximal region are  
132 similar for classes 1 and 2 (Fig 1F, see also S1F Fig).

133 Together, these results show that transcriptional attenuation correlates with asXUT  
134 stabilization in fission yeast, suggesting that asXUTs might be involved in the modulation of sense  
135 genes expression.

136

### 137 **Exo2-deficient cells are defective for *ctt1* induction upon oxidative stress**

138 To further investigate the possibility that asXUTs can regulate expression of their paired-  
139 sense gene and to get insights into the underlying molecular mechanism, we characterized a class 1  
140 gene, *ctt1*, and its paired-antisense *XUT0794* (Fig 2A, see also S2A Fig).

141 *ctt1* encodes a catalase, an enzyme required for survival to oxidative stress upon exposure to  
142 H<sub>2</sub>O<sub>2</sub> [33], and it is strongly induced in this condition [34]. Interestingly, we observed that *exo2Δ* cells  
143 displayed a slight sensitivity to H<sub>2</sub>O<sub>2</sub> in addition to the slow growth and temperature sensitivity (S2B-  
144 C Figs). This suggests that *ctt1* expression in *exo2Δ* cells might also be impaired upon oxidative stress.

145 We therefore analyzed *ctt1* mRNA induction in WT and *exo2Δ* cells upon oxidative stress.  
146 Northern-blot (Fig 2B) and RT-qPCR kinetics analyses (Fig 2C) showed that *exo2Δ* exhibits a 3-fold  
147 reduction in induction rate, with a peak of induction reached 15 minutes after H<sub>2</sub>O<sub>2</sub> addition vs 10 for  
148 the WT (Fig 2C).

149 Strikingly, we observed that *XUT0794* is also activated upon oxidative stress in a WT context  
150 (Fig 2D). Furthermore, its peak of induction is reached very rapidly (5 min), before the *ctt1* mRNA  
151 peak (10 min), suggesting that it might be part of a natural attenuation mechanism (feedback loop)  
152 for *ctt1* expression.

153 In summary, our data suggest that *ctt1* induction requires Exo2 activity for maintaining a low  
154 level of *XUT0794*, antisense to *ctt1*. Upon induction, the XUT is activated and could modulate  
155 expression of *ctt1*, in a similar way as shown for asXUT-associated genes in *S. cerevisiae*, such as  
156 *GAL1-10* [19,20].

157

#### 158 ***ctt1* attenuation level correlates with antisense *XUT0794* abundance**

159 We designed several experiments in order to test whether *ctt1* attenuation directly depends  
160 on antisense *XUT0794*.

161 Firstly, we overexpressed it in *cis*, in WT cells, using a regulatable *P41nmt1* promoter (S3A  
162 Fig). When the promoter is active, *XUT0794* accumulates and *ctt1* is not induced in response to H<sub>2</sub>O<sub>2</sub>  
163 addition (S3A Fig). This demonstrates a causal role of antisense *XUT0794* expression in attenuating  
164 *ctt1*. However, in this particular context where *XUT0794* expression is driven by the strong *P41nmt1*  
165 promoter, it is difficult to draw up any conclusion about a possible role of the lncRNA itself, as the  
166 *ctt1* silencing observed here probably mainly results from transcriptional interference. Note that  
167 *P41nmt1*-driven expression of *XUT0794* in *trans*, from a plasmid, failed to attenuate *ctt1* (S3B Fig).

168 Secondly, we disrupted the *XUT0794* promoter in WT cells using the *ura4* gene (Fig 3A),  
169 which is controlled by a promoter much weaker than *P41nmt1*. Surprisingly, *ura4* insertion did not  
170 abolish *XUT0794* expression (Fig 3B). However, it resulted in *XUT0794* levels similar to those of the



171 *exo2Δ* mutant (Fig 3B). Notably, *ctt1* was significantly attenuated in the *ura4-XUT0794* strain, and  
172 *ctt1* mRNA levels were similar to those of *exo2Δ* cells (Fig 3C). Hence, there is a positive correlation  
173 between *ctt1* attenuation and antisense *XUT0794* levels.

174 In a third experiment, we inserted a self-cleaving hammerhead ribozyme (RZ) at position  
175 254/815 of *XUT0794* (Fig 3D) and integrated the construct at the *ctt1* locus in WT and *exo2Δ* strains,  
176 without any manipulation of *XUT0794* promoter. In the WT + RZ context, neither the 5' nor the 3'  
177 fragment of *XUT0794* accumulated (Fig 3E), and *ctt1* induction was similar to WT cells (Fig 3F). In the  
178 *exo2Δ* + RZ context, the 5' fragment was not detected, but the 3' fragment accumulated 5x more  
179 than in *exo2Δ* without RZ (Fig 3E). This imbalance between the two RNA parts indicates that RZ was  
180 efficiently cleaved, the 5' fragment being presumably degraded [35] while the 3' fragment  
181 accumulated. Importantly, the higher abundance of the 255-815 fragment of *XUT0794* in *exo2Δ* + RZ  
182 cells compared to *exo2Δ* without RZ correlated with a significantly stronger attenuation of *ctt1* (Fig  
183 3F).

184 We conclude that the 255-815 fragment of *XUT0794* is sufficient to attenuate *ctt1* and that  
185 the level of the attenuation depends on the abundance of the asXUT, which is consistent with the  
186 hypothesis that the regulation is mediated by the asXUT but is not an indirect effect of Exo2  
187 inactivation.

188

### 189 **Transcriptional attenuation of *ctt1* in *exo2Δ* cells is characterized by partial RNAPII Ser5** 190 **phosphorylation**

191 To determine whether the attenuation of *ctt1* induction occurs at the transcriptional level,  
192 we performed RNAPII ChIP experiments in WT and *exo2Δ* cells. Upon oxidative stress, RNAPII  
193 occupancy in the mutant showed a significant 2- to 4-fold decrease along the *ctt1* locus (Fig 4A-B),  
194 indicating that the attenuation is transcriptional.

195 Analysis of the distribution of differentially phosphorylated forms of the C-terminal domain  
196 (CTD) of Rpb1, the largest subunit of RNAPII, provided further insights into the mechanism of

197 transcriptional attenuation. Ser5-P RNAPII is associated to the early stages of the transcription cycle  
198 and predominates in the promoter-proximal region of the gene, while Ser2-P RNAPII is associated to  
199 transcription elongation and increases along the gene core [36]. Upon oxidative stress, we observed  
200 a 30% decrease of Ser5-P RNAPII in the 5' and core regions of *ctt1*, in the *exo2Δ* mutant (Fig 4C). In  
201 contrast, Ser2-P RNAPII occupancy was unaffected (Fig 4D).

202 Interestingly, we noted that Ser5-P RNAPII levels remain high across the *ctt1* gene body,  
203 especially in the *XUT0794* overlapping region (Fig 4C, probe C). This could possibly reflect re-initiation  
204 events following collision between convergent RNAPII, in keeping with that *XUT0794* expression is  
205 also activated upon oxidative stress (Fig 2D).

206 In summary, stabilization of *XUT0794* impairs *ctt1* transcription, with less RNAPII loaded on  
207 the gene in response to oxidative stress and an additional reduction of Ser5P.

208

#### 209 **Attenuation of *ctt1* induction depends on histone deacetylation**

210 Several studies in budding yeast have pointed out the role of HDAC, including the class II  
211 HDAC Hda1, in aslncRNA-mediated gene silencing [16,18,19]. To test whether the attenuation of *ctt1*  
212 induction involves an HDAC activity, WT and *exo2Δ* cells were treated with trichostatin A (TSA), an  
213 inhibitor of class I-II HDAC. When exposed to oxidative stress, TSA-treated *exo2Δ* cells accumulated  
214 *ctt1* mRNA to the same level as the control (DMSO-treated) WT strain (Fig 5A). We also noted that  
215 the basal levels of *ctt1* mRNA were increased in the TSA-treated WT and *exo2Δ* cells, indicating that  
216 *ctt1* repression requires an HDAC activity. Furthermore, both *ctt1* mRNA and *XUT0794* levels in TSA-  
217 treated WT cells showed a 2-fold increase compared to the DMSO-treated control after H<sub>2</sub>O<sub>2</sub> addition  
218 (Figs 5A-B). This indicates that the *XUT0794*-associated feedback loop that could modulate *ctt1*  
219 expression in WT cells upon exposure to H<sub>2</sub>O<sub>2</sub> is impaired when HDAC activity is inhibited.

220 On the basis of this observation, we predicted histone acetylation along *ctt1* to decrease  
221 upon *XUT0794* stabilization. ChIP experiments in *ctt1* induction conditions revealed a significant 50%  
222 and 30% reduction of histone H4K5/8/12/16 acetylation and H3K14 acetylation, respectively, in the

223 *exo2Δ* mutant, in the region where *ctt1* gene and *XUT0794* overlap (Fig 5C and S5A Fig; probe C).  
224 These data support the idea that asXUT-mediated gene attenuation depends on HDAC, resulting in  
225 reduced levels of histone acetylation. Importantly, significant histone deacetylation in *exo2Δ* was  
226 also detected across *SPAPB24D3.07c*, another class 1 gene (Fig 5D), but not across the class 2 genes  
227 *ptb1* and *cuf1* (S5B-C Figs). This indicates that histone deacetylation is not a general feature of all the  
228 genes that are transcriptionally down-regulated in *exo2Δ* cells (classes 1-2) but is specific to those  
229 with asXUT (class 1).

230 In an attempt to identify the HDAC involved, we tested the effect of Clr3 (the ortholog of  
231 Hda1), Hos2 (a class I HDAC) and Clr6 (the ortholog of class I HDAC Rpd3). As Clr6 exists in at least  
232 two distinct complexes (Clr6-CI and -CII), we also tested a specific subunit for each them, namely the  
233 ING family protein Png2 (Clr6-CI) and the Sin3 family protein Pst2 (Clr6-CII), respectively [37]. We  
234 used null mutants for Clr3, Hos2, Png2 and Pst2, which are non-essential. For Clr6, which is essential,  
235 we used the thermo-sensitive *clr6-1* point mutation [38]. Except for *pst2Δ*, we could successfully  
236 combine these mutations with *exo2Δ*. Attenuation of *ctt1* was not suppressed in the *exo2Δ clr3Δ*,  
237 *exo2Δ hos2Δ*, *exo2Δ png2Δ* and *exo2Δ clr6-1* mutants (S6A-D Figs), indicating that none of the four  
238 tested factor is involved in the attenuation mechanism. In contrast, the *png2Δ*, *pst2Δ* and *clr6-1*  
239 single mutants exhibited a strong defect of *ctt1* induction (S6C-E Figs). In addition, the *png2Δ* and  
240 *clr6-1* mutations were synergic with *exo2Δ* (S6C-D Figs). This indicates that Exo2 and the Clr6 HDAC  
241 complexes are required for efficient *ctt1* induction, but act independently.

242 In conclusion, XUT-mediated attenuation of *ctt1* requires a HDAC activity, suggesting that  
243 mechanisms of regulation of gene expression by lncRNAs have been conserved across the yeast  
244 clade.

245

#### 246 **Role of Set2-dependent H3K36me3 in *ctt1* attenuation**

247 During transcription, elongating RNAPII recruits the histone methyltransferase (HMT) Set2,  
248 which methylates H3K36 across the gene body [39,40]. Set2-mediated H3K36 trimethylation (me3)

249 then promotes HDAC recruitment and histone deacetylation [41,42,43], in order to suppress spurious  
250 intragenic transcription initiation [44,45].

251 The observation of decreased histone acetylation levels across the *ctt1* gene body in *exo2Δ*  
252 cells (Fig 5C) prompted us to test the role of Set2 and H3K36 methylation in the regulation. In WT  
253 cells, upon oxidative stress, we observed a peak of Set2 occupancy and H3K36me3 in the region  
254 overlapping *XUT0794* (probe C; Figs 6A-B), confirming that Set2 is recruited when *ctt1* expression is  
255 induced. In the *exo2Δ* mutant, H3K36me3 levels were significantly increased, in some positions of  
256 *ctt1*, including the 5' region (probe B) and the 3' extremity (probe E). Surprisingly, in the region  
257 overlapping *XUT0794* (probe C), where Set2 occupancy and histone deacetylation are the most  
258 pronounced (Figs 5C and 6A), the difference with the WT control was not statistically significant (Fig  
259 6B). Perhaps a local change of H3K36me3 does not result into histone deacetylation at that position  
260 but to the nearby region.

261 In parallel, we analyzed the effect of Set2 inactivation on *XUT0794* expression and *ctt1* mRNA  
262 induction. We could only characterize single mutants, as despite our efforts, we failed to combine  
263 *set2Δ* and *exo2Δ*, suggesting that the double mutant is lethal. Strikingly, we found that *set2Δ* cells  
264 accumulate *XUT0794* into levels similar to the *exo2Δ* mutant (Fig 6C). However, *ctt1* induction was  
265 found to be normal in the *set2Δ* context (Fig 6D). These data indicate that the *XUT0794*-associated  
266 regulation of *ctt1* is impaired when Set2 is inactivated.

267 In summary, Set2 is recruited to *ctt1* upon oxidative stress. In absence of Set2, *XUT0794*  
268 accumulation and *ctt1* attenuation are decoupled, indicating that Set2 is required for the *XUT0794*-  
269 associated regulation of *ctt1*.

270

## 271 **Dcr1 regulates *ctt1* induction independently of Exo2**

272 The data presented above show that the Exo2-dependent RNA decay controls *ctt1* induction  
273 and restricts the level of the antisense *XUT0794*. We asked whether other RNA processing factors  
274 could be involved in the regulation. We tested the role of Dicer (Dcr1), involved in RNAi.

275           As shown in Fig 7A, *ctt1* attenuation is not suppressed in the *exo2Δ dcr1Δ* double mutant.  
276   Rather, *ctt1* was found to be attenuated in the *dcr1Δ* single mutant, and we observed a synergic  
277   effect in the *exo2Δ dcr1Δ* double mutant. On the other hand, Dicer overexpression in *exo2Δ* cells had  
278   no impact on *ctt1* attenuation (S7A-C Figs). These data indicate that Exo2 and Dcr1 control *ctt1*  
279   induction through distinct mechanisms. This is further supported by the observation that *XUT0794*  
280   levels are unchanged in *exo2Δ dcr1Δ* cells compared to *exo2Δ* cells (Fig 7B) and by ChIP experiments  
281   showing that in oxidative stress conditions, RNAPII (Fig 7C) and H3K36me3 (S7D Fig) levels are normal  
282   in *dcr1Δ* cells (Fig 7C) while histone H4K5/8/12/16 acetylation is strongly reduced across the whole  
283   *ctt1* locus, including the promoter region (Fig 7D).

284           Thus, Exo2 and Dcr1 regulate *ctt1* induction through independent mechanisms, which is  
285   consistent with the observation that asXUTs are globally not targeted by RNAi in *S. pombe* [30].

286

287 **DISCUSSION**

288 Previous studies in different eukaryotic models have shown that aslncRNAs can regulate  
289 sense gene expression [14]. However, the molecular bases for aslncRNAs-mediated regulation  
290 remain largely unknown. In budding and fission yeasts, aslncRNAs are actively degraded by the  
291 Xrn1/Exo2-dependent cytoplasmic 5'-3' RNA decay pathway [28,29,30]. These Xrn1/Exo2-sensitive  
292 aslncRNAs are named XUTs [28]. In budding yeast, asXUTs stabilization was shown to result into  
293 transcriptional attenuation of a subset of genes, referred to as class 1 [28]. Whether such an asXUT-  
294 associated regulation is conserved in other organisms was unknown.

295 Here, we used NET-Seq to identify genes showing transcriptional attenuation upon  
296 stabilization of their paired-asXUT (class 1) in *S. pombe*. Importantly, asXUT presence and sense gene  
297 attenuation in *exo2Δ* are not independent, supporting the idea that the regulation is mediated by the  
298 stabilized asXUTs and is not a side effect of Exo2 inactivation. However, additional mechanistic  
299 analyses are required to confirm this hypothesis.

300 In a previous study, we reported that the asXUT-associated genes are globally less  
301 transcribed than the 'solo' ones (without asXUT), displaying an hypoacetylated promoter and  
302 hyperacetylation across the gene body [30]. Here we show that the asXUT-associated genes can be  
303 separated in two distinct subgroups, namely class 1 (attenuated upon asXUT stabilization in *exo2Δ*)  
304 and class 3 (unchanged in *exo2Δ*). Class 1 corresponds to highly transcribed genes showing  
305 prominent nucleosome depletion and high histone acetylation levels at the promoter. In addition,  
306 class 1 displays high TSS-proximal antisense transcription, suggesting that the TSS region could be a  
307 possible determinant for aslncRNA-mediated regulation. In contrast, class 3 is weakly transcribed,  
308 and displays poor promoter-proximal nucleosome depletion and low histone acetylation. Upon  
309 stabilization of asXUTs, transcription of class 1 drops down to the basal levels of class 3. This suggests  
310 the existence of a regulatory threshold, *ie* asXUTs would modulate expression of their associated  
311 sense genes, only if expression is above this threshold. This hypothesis contrasts with a previous

312 model based on the analysis of sense-antisense RNA levels in budding yeast, which proposed that  
313 antisense-mediated repression would be restricted to low sense expression [46].

314 Our data suggests that a subset of asXUTs could regulate gene expression at the  
315 transcriptional level, reducing sense transcription, as previously shown in *S. cerevisiae* [18,28]. XUTs  
316 could also act at other steps of the gene expression process, especially at the post-transcriptional  
317 level. In this regard, aslncRNAs have been shown to modulate protein production in response to  
318 osmotic stress in *S. pombe* [23]. In *S. cerevisiae*, disruption of several aslncRNAs results into increased  
319 protein synthesis from their paired-sense mRNAs, indicating a role of these aslncRNAs in the control  
320 of protein abundance [47]. Future investigations will be required to explore the regulatory potential  
321 of asXUTs and to determine the step(s) of the gene expression process they act on.

322 To get insights into the mechanism by which asXUTs could attenuate gene expression, we  
323 selected a class 1 representative, the catalase-coding gene *ctt1*, for further characterization.  
324 Induction of *ctt1* in response to oxidative stress was attenuated in *exo2Δ* cells, correlating with  
325 antisense *XUT0794* accumulation. Our data indicate that *ctt1* attenuation in Exo2-deficient cells  
326 occurs at the transcriptional level and is mediated by HDAC activity. Our attempts to identify the  
327 HDAC involved in the attenuation mechanism were unsuccessful, most likely due to redundancy of  
328 HDAC activities, considering the results obtained upon TSA treatment. On the other hand, we show  
329 that the Clr6ClfII complexes (the homolog of Rpd3L and Rpd3S, respectively) are required for *ctt1*  
330 induction (S6C-E Fig). The mechanism of HDAC recruitment also remains to be determined. Although  
331 we cannot formally exclude a direct recruitment by the asXUT itself, the HDAC is probably recruited  
332 through the Set2-dependent H3K36me3 marks. Consistent with this hypothesis, the most  
333 hypoacetylated region of *ctt1* corresponds to the peak of Set2 occupancy and H3K36me3.  
334 Furthermore, at the RNA level, the loss of HDAC activity and the inactivation of Set2 have a similar  
335 effect, decoupling *XUT0794* accumulation and *ctt1* regulation.

336 Whether *ctt1* attenuation in *exo2Δ* cells depends on the stabilized asXUT *per se* and/or on  
337 the act of antisense transcription remains unsolved to date. On one hand, the ribozyme experiment

338 shows that *ctt1* attenuation level positively correlates with *XUT0794* abundance (Figs 3E-F), in a  
339 context where the promoter of the XUT (and presumably the level of antisense nascent transcription)  
340 remains unchanged, which is consistent with a regulation mediated by the RNA. On the other hand,  
341 the local increase of H3K36me3 across the *ctt1* gene body in *exo2Δ* cells (Fig 6B) suggests that *ctt1*  
342 regulation could also depend on transcriptional interference. In fission yeast, gene repression by  
343 transcriptional interference requires Set2 and the Clr6CII complex [48]. Here, we show that Set2 and  
344 Clr6CII have different effects on *ctt1* induction: it is normal in Set2-deficient cells (Fig 6D) but  
345 attenuated upon inactivation of Clr6CII components (S6E Fig). This suggests that the roles of Set2 and  
346 Clr6CII might differ from a gene to another.

347 The model of a RNA-mediated regulation raises a key mechanistic question: how could an  
348 asXUT, which in all likelihood accumulates in the cytoplasm in *exo2Δ* cells, act in the nucleus to  
349 regulate the transcription of their paired-sense genes? This remains unknown to date. One possibility  
350 is that the stabilized XUTs could shuttle between the cytoplasm to the nucleus, as shown for tRNAs in  
351 budding yeast [49,50] and also in mammalian cells [51].

352 Most of the effects we described have been observed in mutant cells. But does antisense  
353 *XUT0794* play any role in WT cells? Interestingly, we observed that *XUT0794* is also rapidly induced in  
354 WT cells after H<sub>2</sub>O<sub>2</sub> addition, suggesting that it could participate in the modulation of *ctt1* induction.  
355 In this respect, a recent study in human fibroblasts identified a class of stress-induced aslncRNAs,  
356 which are activated upon oxidative stress [8], suggesting that aslncRNAs induction might be part of a  
357 conserved response to oxidative stress in Eukaryotes. Demonstrating that *XUT0794* plays a direct role  
358 in the modulation of *ctt1* during oxidative stress relies, among others, on the ability to block its  
359 expression. Unfortunately, none of the strategies we used in this work succeeded into blocking  
360 *XUT0794*. Additional work will be required to implement in fission yeast other techniques developed  
361 in *S. cerevisiae* to strand-specifically block aslncRNA synthesis [47,52], which remains technically  
362 challenging yet. For instance, at some loci, the CRISPR interference approach is not strand-specific  
363 and results in the production of novel isoforms of the targeted aslncRNA [53].



364           Efficient Induction of *ctt1* upon oxidative stress depends on multiple factors [54]. In addition  
365 to Exo2, we showed that Dcr1 also contributes to *ctt1* induction. Our data indicate that Dcr1 and  
366 Exo2 regulate *ctt1* through distinct mechanisms, which is consistent with the observations that  
367 asXUTs are not targeted by Dicer in fission yeast [30]. Interestingly, Dcr1 was recently shown to  
368 promote efficient termination of a set of highly transcribed genes, corresponding to sites of  
369 replication stress and DNA damage [55], and *ctt1* belongs to this set of Dcr1-terminated genes. Thus,  
370 one possibility could be that Dcr1 regulates *ctt1* induction at the level of transcription termination.  
371 However, our ChIP data did not reveal any significant change of RNAPII occupancy at the 3' extremity  
372 of *ctt1* in *dcr1Δ* cells, upon oxidative stress (Fig 7C). Additional analyses are therefore required to  
373 decipher the mechanism by which Dcr1 regulates *ctt1* induction.

374           In conclusion, our work in budding and fission yeasts shows that the cytoplasmic 5'-end RNA  
375 decay plays a key role in controlling aslncRNAs endowed with regulatory potential. Given the high  
376 conservation of Xrn1 in Eukaryotes, it is tempting to speculate that asXUTs and their regulatory  
377 activity are conserved in higher eukaryotes, contributing in buffering genome expression, and adding  
378 another layer to the complexity of gene regulation.

379

## 380 MATERIALS & METHODS

### 381 *Yeast strains, plasmids and media*

382 All the strains used in this study are listed in S5 Table. Mutant strains were constructed by  
383 meiotic cross or transformation, and verified by PCR on genomic DNA and/or RT-qPCR. Plasmid  
384 pAM353 for expression of *XUT0794* in *trans* was constructed by cloning *XUT0794* in the Sall site of  
385 pREP41 (*ars1 LEU2 P41nmt1*). Sanger sequencing confirmed the correct orientation of the insert and  
386 the absence of mutation. Hammerhead ribozyme [56] was inserted in *XUT0794* by two-step PCR,  
387 giving a 3.2 Kb final product corresponding to *ctt1* mRNA coordinates +/- 500 bp that was cloned in  
388 pREP41. After verification of absence of additional mutations by Sanger sequencing, the ribozyme-  
389 containing construct was excised and transformed in the YAM2534 strain (*ctt1::ura4*). Transformants  
390 were selected on 5-FOA plates and analyzed by PCR on genomic DNA. Deletion of *exo2* was  
391 performed subsequently.

392 Strains were grown at 32°C to mid-log phase (OD<sub>595</sub> 0,5) in YES or EMM-L medium. For *ctt1*  
393 induction, 1 mM H<sub>2</sub>O<sub>2</sub> was added for 15 minutes [34], or different time points for analysis of kinetics  
394 of induction. Expression from *P41nmt1* was repressed by growing cells in EMM-L + 15 µM thiamine  
395 for 24 hours.

396

### 397 *NET-Seq*

398 NET-Seq libraries were constructed from biological duplicates of YAM2507 (*exo2Δ rpb3-flag*)  
399 cells and sequenced as previously described [30]. Libraries for the WT strain YAM2492 (*rpb3-flag*)  
400 were described in the same previous report [30].

401 After removal of the 5'-adapter sequence, reads were uniquely mapped to the reference  
402 genome (ASM294v2.30) using version 0.12.8 of Bowtie [57], with a tolerance of 2 mismatches.

403 Differential analysis was performed between the IP samples from WT and *exo2Δ* using DESeq  
404 [58]. Genes showing significant decrease (*P*-value <0.05, adjusted for multiple testing with the  
405 Benjamini-Hochberg procedure) in the mutant were defined as class 1 & 2.

406 Raw sequences have been deposited to the NCBI Gene Expression Omnibus (accession  
407 number GEO: GSE106649). A genome browser for visualization of NET-Seq processed data is  
408 accessible at <http://vm-gb.curie.fr/mw3>.

409

#### 410 *Total RNA extraction*

411 Total RNA was extracted from exponentially growing cells using standard hot phenol  
412 procedure, resuspended in nuclease-free H<sub>2</sub>O (Ambion) and quantified using a NanoDrop 2000c  
413 spectrophotometer.

414

#### 415 *Northern blot*

416 10 µg of total RNA were loaded on denaturing 1.2% agarose gel and transferred to Hybond™-  
417 XL nylon membrane (GE Healthcare). *ctt1* mRNA and U3B were detected using AMO2063 and  
418 AMO2081 oligonucleotides, respectively (see S6 Table). <sup>32</sup>P-labelled probes were hybridized  
419 overnight at 42°C in ULTRAhyb®-Oligo hybridization buffer (Ambion). Quantitation used a Typhoon  
420 Trio PhosphorImager and the ImageQuant TL v5.2 software (GE Healthcare).

421

#### 422 *Strand-specific RT-qPCR*

423 Strand-specific reverse transcription (RT) reactions were performed from at least three  
424 biological replicates, using 1 µg of total RNA and the SuperScript®II Reverse Transcriptase kit  
425 (Invitrogen), in the presence of 6,25 µg/ml actinomycin D. For each sample, a control without RT was  
426 included. Subsequent quantitative real-time PCR were performed on technical duplicates, using a  
427 LightCycler® 480 instrument (Roche). Oligonucleotides used are listed in S6 Table.

428

#### 429 *ChIP*

430 ChIP analysis was performed from three biological replicates, for each strain. Exponentially  
431 growing (OD<sub>595</sub> 0,5) cells were fixed for 10 minutes at room temperature using formaldehyde (1%

432 final concentration), then glycine was added (0,4 M final concentration) for 5 minutes. Chromatin  
433 was sonicated using a Bioruptor® sonication device (Diagenode). Antibodies used were 8WG16  
434 (Covance) for RNAPII, H14 (Covance) for RNAPII S5-Pho, 3E10 (Millipore) for RNAPII S2-Pho, ab1791  
435 (Abcam) for histone H3, 05-1355 (Millipore) for acetyl-H4 (Lys5/8/12/16), 07-353 (Millipore) for  
436 acetyl-H3 (Lys14), ab9050 (Abcam) for H3K36me3 and 9E10 (Protein Expression and Purification Core  
437 Facility, Institut Curie) for Myc. Quantitative real-time PCR were performed in technical duplicates on  
438 a StepOnePlus™ machine (Applied Biosystems) or on a LightCycler® 480 instrument (Roche).  
439 Oligonucleotides used are listed in S6 Table.

440

441 **ACKNOWLEDGMENTS**

442           We would like to thank Fred Winston for the Set2-Myc strain and Danesh Moazed for the  
443 *dcr10E* vector. We also thank Thomas Rio Frio, Sylvain Baulande, Patricia Legoix-Né and Virginie  
444 Raynal (NGS platform, Institut Curie). We are grateful to Nicolas Vogt and Ugo Szachnowski for  
445 assistance. We thank all the members of our labs for discussions and critical reading of the  
446 manuscript.

## 447 References

- 448 1. Clark MB, Amaral PP, Schlesinger FJ, Dinger ME, Taft RJ, et al. (2011) The reality of pervasive  
449 transcription. *PLoS Biol* 9: e1000625; discussion e1001102.
- 450 2. Jarroux J, Morillon A, Pinskaya M (2017) History, Discovery, and Classification of lncRNAs. *Adv Exp*  
451 *Med Biol* 1008: 1-46.
- 452 3. Wery M, Kwapisz M, Morillon A (2011) Noncoding RNAs in gene regulation. *Wiley Interdiscip Rev*  
453 *Syst Biol Med* 3: 728-738.
- 454 4. Guttman M, Amit I, Garber M, French C, Lin MF, et al. (2009) Chromatin signature reveals over a  
455 thousand highly conserved large non-coding RNAs in mammals. *Nature* 458: 223-227.
- 456 5. Khalil AM, Guttman M, Huarte M, Garber M, Raj A, et al. (2009) Many human large intergenic  
457 noncoding RNAs associate with chromatin-modifying complexes and affect gene expression.  
458 *Proc Natl Acad Sci U S A* 106: 11667-11672.
- 459 6. de Andres-Pablo A, Morillon A, Wery M (2017) lncRNAs, lost in translation or licence to regulate?  
460 *Curr Genet* 63: 29-33.
- 461 7. Djebali S, Davis CA, Merkel A, Dobin A, Lassmann T, et al. (2012) Landscape of transcription in  
462 human cells. *Nature* 489: 101-108.
- 463 8. Giannakakis A, Zhang J, Jenjaroenpun P, Nama S, Zainolabidin N, et al. (2015) Contrasting  
464 expression patterns of coding and noncoding parts of the human genome upon oxidative  
465 stress. *Sci Rep* 5: 9737.
- 466 9. Saha P, Verma S, Pathak RU, Mishra RK (2017) Long Noncoding RNAs in Mammalian Development  
467 and Diseases. *Adv Exp Med Biol* 1008: 155-198.
- 468 10. Schmitt AM, Chang HY (2016) Long Noncoding RNAs in Cancer Pathways. *Cancer Cell* 29: 452-463.
- 469 11. Renganathan A, Felley-Bosco E (2017) Long Noncoding RNAs in Cancer and Therapeutic Potential.  
470 *Adv Exp Med Biol* 1008: 199-222.
- 471 12. Mercer TR, Dinger ME, Mattick JS (2009) Long non-coding RNAs: insights into functions. *Nat Rev*  
472 *Genet* 10: 155-159.
- 473 13. Rinn JL, Chang HY (2012) Genome regulation by long noncoding RNAs. *Annu Rev Biochem* 81:  
474 145-166.
- 475 14. Pelechano V, Steinmetz LM (2013) Gene regulation by antisense transcription. *Nat Rev Genet* 14:  
476 880-893.
- 477 15. Uhler JP, Hertel C, Svejstrup JQ (2007) A role for noncoding transcription in activation of the yeast  
478 PHO5 gene. *Proc Natl Acad Sci U S A* 104: 8011-8016.
- 479 16. Camblong J, Iglesias N, Fickentscher C, Dieppois G, Stutz F (2007) Antisense RNA stabilization  
480 induces transcriptional gene silencing via histone deacetylation in *S. cerevisiae*. *Cell* 131: 706-  
481 717.
- 482 17. Camblong J, Beyrouthy N, Guffanti E, Schlaepfer G, Steinmetz LM, et al. (2009) Trans-acting  
483 antisense RNAs mediate transcriptional gene cosuppression in *S. cerevisiae*. *Genes Dev* 23:  
484 1534-1545.
- 485 18. Berretta J, Pinskaya M, Morillon A (2008) A cryptic unstable transcript mediates transcriptional  
486 trans-silencing of the Ty1 retrotransposon in *S. cerevisiae*. *Genes Dev* 22: 615-626.
- 487 19. Houseley J, Rubbi L, Grunstein M, Tollervey D, Vogelauer M (2008) A ncRNA modulates histone  
488 modification and mRNA induction in the yeast GAL gene cluster. *Mol Cell* 32: 685-695.
- 489 20. Pinskaya M, Gourvenec S, Morillon A (2009) H3 lysine 4 di- and tri-methylation deposited by  
490 cryptic transcription attenuates promoter activation. *EMBO J* 28: 1697-1707.
- 491 21. van Werven FJ, Neuert G, Hendrick N, Lardenois A, Buratowski S, et al. (2012) Transcription of  
492 two long noncoding RNAs mediates mating-type control of gametogenesis in budding yeast.  
493 *Cell* 150: 1170-1181.
- 494 22. Bitton DA, Grallert A, Scutt PJ, Yates T, Li Y, et al. (2011) Programmed fluctuations in  
495 sense/antisense transcript ratios drive sexual differentiation in *S. pombe*. *Mol Syst Biol* 7:  
496 559.

- 497 23. Leong HS, Dawson K, Wirth C, Li Y, Connolly Y, et al. (2014) A global non-coding RNA system  
498 modulates fission yeast protein levels in response to stress. *Nat Commun* 5: 3947.
- 499 24. Fauquenoy S, Migeot V, Finet O, Yague-Sanz C, Khorosjutina O, et al. (2018) Repression of Cell  
500 Differentiation by a cis-Acting lincRNA in Fission Yeast. *Curr Biol* 28: 383-391 e383.
- 501 25. Swiezewski S, Liu F, Magusin A, Dean C (2009) Cold-induced silencing by long antisense  
502 transcripts of an Arabidopsis Polycomb target. *Nature* 462: 799-802.
- 503 26. Yap KL, Li S, Munoz-Cabello AM, Raguz S, Zeng L, et al. (2010) Molecular interplay of the  
504 noncoding RNA ANRIL and methylated histone H3 lysine 27 by polycomb CBX7 in  
505 transcriptional silencing of INK4a. *Mol Cell* 38: 662-674.
- 506 27. Lee JT, Lu N (1999) Targeted mutagenesis of Tsix leads to nonrandom X inactivation. *Cell* 99: 47-  
507 57.
- 508 28. Van Dijk EL, Chen CL, d'Aubenton-Carafa Y, Gourvenec S, Kwapisz M, et al. (2011) XUTs are a  
509 class of Xrn1-sensitive antisense regulatory non coding RNA in yeast. *Nature* 475: 114-117.
- 510 29. Wery M, Describes M, Vogt N, Dallongeville AS, Gautheret D, et al. (2016) Nonsense-Mediated  
511 Decay Restricts LncRNA Levels in Yeast Unless Blocked by Double-Stranded RNA Structure.  
512 *Mol Cell* 61: 379-392.
- 513 30. Wery M, Gautier C, Describes M, Yoda M, Vennin-Rendos H, et al. (2018) Native elongating  
514 transcript sequencing reveals global anti-correlation between sense and antisense nascent  
515 transcription in fission yeast. *RNA* 24: 196-208.
- 516 31. Szankasi P, Smith GR (1996) Requirement of *S. pombe* exonuclease II, a homologue of *S.*  
517 *cerevisiae* Sep1, for normal mitotic growth and viability. *Curr Genet* 30: 284-293.
- 518 32. Kief DR, Warner JR (1981) Coordinate control of syntheses of ribosomal ribonucleic acid and  
519 ribosomal proteins during nutritional shift-up in *Saccharomyces cerevisiae*. *Mol Cell Biol* 1:  
520 1007-1015.
- 521 33. Mutoh N, Nakagawa CW, Yamada K (1999) The role of catalase in hydrogen peroxide resistance in  
522 fission yeast *Schizosaccharomyces pombe*. *Can J Microbiol* 45: 125-129.
- 523 34. Calvo IA, Garcia P, Ayte J, Hidalgo E (2012) The transcription factors Pap1 and Prr1 collaborate to  
524 activate antioxidant, but not drug tolerance, genes in response to H<sub>2</sub>O<sub>2</sub>. *Nucleic Acids Res*  
525 40: 4816-4824.
- 526 35. Khvorova A, Lescoute A, Westhof E, Jayasena SD (2003) Sequence elements outside the  
527 hammerhead ribozyme catalytic core enable intracellular activity. *Nat Struct Biol* 10: 708-  
528 712.
- 529 36. Drogat J, Hermand D (2012) Gene-specific requirement of RNA polymerase II CTD  
530 phosphorylation. *Mol Microbiol* 84: 995-1004.
- 531 37. Nicolas E, Yamada T, Cam HP, Fitzgerald PC, Kobayashi R, et al. (2007) Distinct roles of HDAC  
532 complexes in promoter silencing, antisense suppression and DNA damage protection. *Nat*  
533 *Struct Mol Biol* 14: 372-380.
- 534 38. Grewal SI, Bonaduce MJ, Klar AJ (1998) Histone deacetylase homologs regulate epigenetic  
535 inheritance of transcriptional silencing and chromosome segregation in fission yeast.  
536 *Genetics* 150: 563-576.
- 537 39. Li B, Howe L, Anderson S, Yates JR, 3rd, Workman JL (2003) The Set2 histone methyltransferase  
538 functions through the phosphorylated carboxyl-terminal domain of RNA polymerase II. *J Biol*  
539 *Chem* 278: 8897-8903.
- 540 40. Xiao T, Hall H, Kizer KO, Shibata Y, Hall MC, et al. (2003) Phosphorylation of RNA polymerase II  
541 CTD regulates H3 methylation in yeast. *Genes Dev* 17: 654-663.
- 542 41. Drouin S, Laramee L, Jacques PE, Forest A, Bergeron M, et al. (2010) DSIF and RNA polymerase II  
543 CTD phosphorylation coordinate the recruitment of Rpd3S to actively transcribed genes.  
544 *PLoS Genet* 6: e1001173.
- 545 42. Govind CK, Qiu H, Ginsburg DS, Ruan C, Hofmeyer K, et al. (2010) Phosphorylated Pol II CTD  
546 recruits multiple HDACs, including Rpd3C(S), for methylation-dependent deacetylation of  
547 ORF nucleosomes. *Mol Cell* 39: 234-246.

- 548 43. Venkatesh S, Workman JL (2013) Set2 mediated H3 lysine 36 methylation: regulation of  
549 transcription elongation and implications in organismal development. *Wiley Interdiscip Rev*  
550 *Dev Biol* 2: 685-700.
- 551 44. Carrozza MJ, Li B, Florens L, Suganuma T, Swanson SK, et al. (2005) Histone H3 methylation by  
552 Set2 directs deacetylation of coding regions by Rpd3S to suppress spurious intragenic  
553 transcription. *Cell* 123: 581-592.
- 554 45. Keogh MC, Kurdistani SK, Morris SA, Ahn SH, Podolny V, et al. (2005) Cotranscriptional set2  
555 methylation of histone H3 lysine 36 recruits a repressive Rpd3 complex. *Cell* 123: 593-605.
- 556 46. Xu Z, Wei W, Gagneur J, Clauder-Munster S, Smolik M, et al. (2011) Antisense expression  
557 increases gene expression variability and locus interdependency. *Mol Syst Biol* 7: 468.
- 558 47. Huber F, Bunina D, Gupta I, Khmelinskii A, Meurer M, et al. (2016) Protein Abundance Control by  
559 Non-coding Antisense Transcription. *Cell Rep* 15: 2625-2636.
- 560 48. Ard R, Allshire RC (2016) Transcription-coupled changes to chromatin underpin gene silencing by  
561 transcriptional interference. *Nucleic Acids Res* 44: 10619-10630.
- 562 49. Shaheen HH, Hopper AK (2005) Retrograde movement of tRNAs from the cytoplasm to the  
563 nucleus in *Saccharomyces cerevisiae*. *Proc Natl Acad Sci U S A* 102: 11290-11295.
- 564 50. Takano A, Endo T, Yoshihisa T (2005) tRNA actively shuttles between the nucleus and cytosol in  
565 yeast. *Science* 309: 140-142.
- 566 51. Shaheen HH, Horetsky RL, Kimball SR, Murthi A, Jefferson LS, et al. (2007) Retrograde nuclear  
567 accumulation of cytoplasmic tRNA in rat hepatoma cells in response to amino acid  
568 deprivation. *Proc Natl Acad Sci U S A* 104: 8845-8850.
- 569 52. Lenstra TL, Coulon A, Chow CC, Larson DR (2015) Single-Molecule Imaging Reveals a Switch  
570 between Spurious and Functional ncRNA Transcription. *Mol Cell* 60: 597-610.
- 571 53. Howe FS, Russell A, Lamstaes AR, El-Sagheer A, Nair A, et al. (2017) CRISPRi is not strand-specific  
572 at all loci and redefines the transcriptional landscape. *Elife* 6.
- 573 54. Garcia P, Encinar Del Dedo J, Ayte J, Hidalgo E (2016) Genome-wide Screening of Regulators of  
574 Catalase Expression: ROLE OF A TRANSCRIPTION COMPLEX AND HISTONE AND tRNA  
575 MODIFICATION COMPLEXES ON ADAPTATION TO STRESS. *J Biol Chem* 291: 790-799.
- 576 55. Castel SE, Ren J, Bhattacharjee S, Chang AY, Sanchez M, et al. (2014) Dicer promotes transcription  
577 termination at sites of replication stress to maintain genome stability. *Cell* 159: 572-583.
- 578 56. Libri D, Dower K, Boulay J, Thomsen R, Rosbash M, et al. (2002) Interactions between mRNA  
579 export commitment, 3'-end quality control, and nuclear degradation. *Mol Cell Biol* 22: 8254-  
580 8266.
- 581 57. Langmead B, Trapnell C, Pop M, Salzberg SL (2009) Ultrafast and memory-efficient alignment of  
582 short DNA sequences to the human genome. *Genome Biol* 10: R25.
- 583 58. Anders S, Huber W (2010) Differential expression analysis for sequence count data. *Genome Biol*  
584 11: R106.
- 585 59. Describes M, Zouari YB, Wery M, Legendre R, Gautheret D, et al. (2015) VING: a software for  
586 visualization of deep sequencing signals. *BMC Res Notes* 8: 419.
- 587 60. DeGennaro CM, Alver BH, Marguerat S, Stepanova E, Davis CP, et al. (2013) Spt6 regulates  
588 intragenic and antisense transcription, nucleosome positioning, and histone modifications  
589 genome-wide in fission yeast. *Mol Cell Biol* 33: 4779-4792.
- 590 61. Yu R, Jih G, Iglesias N, Moazed D (2014) Determinants of heterochromatic siRNA biogenesis and  
591 function. *Mol Cell* 53: 262-276.

594



595 **FIGURE LEGENDS**

596 **Fig 1. Genome-wide identification of class 1 genes in *S. pombe*.**

597 **A.** Transcriptional attenuation in *exo2* $\Delta$  cells. NET-Seq analysis was performed from biological  
598 duplicates of WT and *exo2* $\Delta$  cells. Data for the WT strain were previously described [30]. After  
599 sequencing, differential analysis discriminated genes showing significant ( $P < 0.05$ ) reduction of  
600 transcription (classes 1-2) or not (classes 3-4). Among them, classes 1 and 3 have asXUT. The number  
601 of genes for each class is indicated.

602 **B.** Box-plot of nascent transcription (NET-Seq) signal for class 1-4 genes in WT (dark grey boxes) and  
603 *exo2* $\Delta$  ( $\Delta$ ; light grey boxes).

604 **C.** Metagene view of NET-Seq signals along class 1 and 3 genes in WT cells. For each class, normalized  
605 coverage (tag/nt,  $\log_2$ ) along mRNA transcription start site (TSS) +/- 1000 nt (sense) and the antisense  
606 (as) strand were piled up, in a strand-specific manner. Average signal for the sense and antisense  
607 strands was plotted for class 1 (red) and class 3 (green). The shading surrounding each line denotes  
608 the 95% confidence interval.

609 **D.** Same as above in *exo2* $\Delta$ .

610 **E.** Density-plot showing the global NET-Seq (dashed lines) and total RNA-Seq (solid lines) signals for  
611 XUTs in the WT (black) and *exo2* $\Delta$  (pink) strains. Total RNA-Seq data were previously described [30].

612 **F.** Metagene view of H4K5/8/12/16 acetylation (H4ac) for class 1 (red), class 2 (blue), class 3 (green)  
613 and class 4 (black) genes in WT cells. CHIP-Seq libraries construction and sequencing were previously  
614 described [30]. Metagene representation of signal for each class of genes was performed as above, in  
615 a strand-unspecific manner, using ratio of coverage ( $\log_2$ ) for H4ac and H3. The shading surrounding  
616 each line denotes the 95% confidence interval.

617

618 **Fig 2. *ctt1* induction upon oxidative stress is impaired *Exo2*-deficient cells.**

619 **A.** Snapshot of nascent transcription (NET-Seq) signals along the *ctt1* gene in WT (upper panels) and  
620 *exo2* $\Delta$  (lower panels) cells. In each panel, the signal corresponding to the sense (+) and antisense (-)

621 strand is shown in blue and pink, respectively. Blue and red arrows represent the *ctt1* mRNA and  
622 antisense *XUT0794*, respectively. NET-Seq data for the WT strain were previously described [30]. The  
623 snapshot was produced using VING [59].

624 **B.** Northern blot analysis of *ctt1* mRNA induction in WT and *exo2Δ* cells. YAM2400 (WT) and  
625 YAM2402 (*exo2Δ*) cells were grown to mid-log phase in rich medium and collected before or after  
626 addition of 1 mM H<sub>2</sub>O<sub>2</sub> for 15 min. *ctt1* mRNA and U3B snoRNA were detected from total RNA using  
627 <sup>32</sup>P-labelled oligonucleotides. Numbers represent the *ctt1* mRNA/U3B ratio (ND: not determined).

628 **C.** YAM2400 (WT) and YAM2402 (*exo2Δ*) cells grown in rich YES medium to mid-log phase were  
629 collected 0, 2, 5, 10, 15, 30 and 45 minutes after addition of 1 mM H<sub>2</sub>O<sub>2</sub>. *ctt1* mRNA was quantified  
630 from total RNA using strand-specific RT-qPCR and normalized on the level of the U3B snoRNA. Data  
631 are presented as mean +/- standard error of the mean (SEM), calculated from three biological  
632 replicates.

633 **D.** Strand-specific RT-qPCR analysis of *ctt1* mRNA and *XUT0794* induction in WT cells upon H<sub>2</sub>O<sub>2</sub>  
634 treatment. *ctt1* mRNA (blue) and *XUT0794* (red) were quantified as above. Relative level of each  
635 transcript in the non-induced condition (T0) was set to 1. Mean and SEM values were calculated from  
636 three biological replicates.

637

638 **Fig 3. *ctt1* attenuation level correlates with *XUT0794* abundance.**

639 **A.** Schematic representation of *ura4* insertion upstream from *XUT0794*.

640 **B.** Analysis of *XUT0794* level upon *ura4* insertion. Strains YAM2400 (WT), YAM2402 (*exo2Δ*) and  
641 YAM2817 (*ura4-XUT0794*) cells were grown to mid-log phase in rich YES medium. *XUT0794* level was  
642 determined by strand-specific RT-qPCR from total RNA as described in Fig 2C. Data are presented as  
643 mean +/- SEM, calculated from three biological replicates. \*\* *p* < 0.01; ns, not significant upon t-test.

644 **C.** Analysis of *ctt1* mRNA level upon *ura4* insertion. Strains YAM2400 (WT), YAM2402 (*exo2Δ*) and  
645 YAM2817 (*ura4-XUT0794*) cells grown to mid-log phase in rich medium were collected before or  
646 after addition of 1 mM H<sub>2</sub>O<sub>2</sub> for 15 min. *ctt1* mRNA level was determined by strand-specific RT-qPCR

647 as described in Fig 2C. Mean and SEM are calculated from three biological replicates. \*\*\*  $p < 0.001$ ; ns,  
648 not significant upon t-test.

649 **D.** Schematic representation of hammerhead ribozyme (RZ) inserted within *XUT0794*. Self-cleaving  
650 RZ was inserted at position 254 of *XUT0794*. Position of qPCR amplicons C and D is indicated.

651 **E.** Analysis of *XUT0794* upstream from and downstream to RZ insertion site. YAM2400 (WT),  
652 YAM2402 (*exo2Δ*), YAM2565 (WT + RZ) and YAM2567 (*exo2Δ* + RZ) were grown as described in Fig  
653 3B. Strand-specific RT on *XUT0794* was performed from total RNA using oligonucleotide AMO2069.  
654 Oligonucleotides AMO2535-6 (amplicon D) and AMO2069-70 (amplicon C) were used for qPCR  
655 detection of *XUT0794* 5' and 3' fragment, respectively. Data were normalized on U3B snoRNA. For  
656 each amplicon, the normalized level of *XUT0794* in *exo2Δ* was then set to 1. Results are presented as  
657 mean +/- SEM, calculated from four biological replicates.

658 **F.** Analysis of *ctt1* mRNA levels. Strains and cultures were in Fig 3C; strand-specific RT on *ctt1* mRNA  
659 was performed using oligonucleotide AMO2535; qPCR was performed using AMO2535-6 (amplicon  
660 D). Data were normalized on U3B levels and are presented as mean +/- SEM, calculated from four  
661 biological replicates. \*\*  $p < 0.01$ ; \*\*\*  $p < 0.001$ ; ns, not significant upon t-test.

662

663 **Fig 4. asXUT-mediated attenuation of *ctt1* is transcriptional.**

664 **A.** Schematic map of the *ctt1* locus, with positions of the qPCR oligonucleotide pairs.

665 **B.** CHIP analysis of RNAPII occupancy across *ctt1*. Strains YAM2400 (WT) and YAM2402 (*exo2Δ*) were  
666 grown as in Fig 2B. After cross-linking, chromatin extraction and sonication, RNAPII was  
667 immunoprecipitated using antibody against the CTD of its largest subunit Rpb1. Co-precipitated DNA  
668 was purified and quantified by qPCR. Data were normalized on the *act1* signal, which is not  
669 controlled to an asXUT (see S4 Fig). The dashed line indicates the background signal observed on an  
670 intergenic region of chromosome I used as negative control. Data are presented as mean +/- SEM,  
671 from three biological replicates. \*  $p < 0.05$ ; \*\*\*  $p < 0.001$ ; ns, not significant upon t-test.

672 **C-D.** ChIP analysis of Ser5-P and Ser2-P occupancy along *ctt1*. RNAPII was immunoprecipitated from  
673 the same chromatin extracts as above, using antibody against the Ser5-P (C) or the Ser2-P (D) form of  
674 Rpb1 CTD. Data normalization was as above. For each position of *ctt1*, the ratio between Ser5-P or  
675 Ser2-P and total RNAPII is shown. Mean and SEM values were calculated from three biological  
676 replicates. \* $p<0.05$ ; \*\* $p<0.01$ ; ns, not significant upon t-test.

677

678 **Fig 5. asXUT-mediated attenuation of *ctt1* depends on HDAC.**

679 **A-B.** Strand-specific RT-qPCR analysis of *ctt1* mRNA and *XUT0794* levels in the presence of HDAC  
680 inhibitor. Strains YAM2400 (WT) and YAM2402 (*exo2Δ*) were grown in rich medium to mid-log phase  
681 before addition of 40  $\mu\text{g/ml}$  TSA or equivalent volume of DMSO for 2 hours. TSA-treated and control  
682 cells were then collected prior or after addition of  $\text{H}_2\text{O}_2$  for 15 min. *ctt1* mRNA (A) and *XUT0794* (B)  
683 were quantified as described above. Data are presented as mean  $\pm$  SEM, calculated from three  
684 biological replicates.

685 **C.** ChIP analysis of H4K5/8/12/16 acetylation along *ctt1*. Culture, cross-linking and chromatin  
686 extraction were as described in Fig 4B. For each position, data were first normalized on *act1*, then on  
687 the level of histone H3, immunoprecipitated from the same chromatin. Data are presented as above.  
688 \* $p<0.05$ ; \*\*\* $p<0.001$ ; ns, not significant upon t-test.

689 **D.** ChIP analysis of H4K5/8/12/16 acetylation along the *SPAPB24D3.07c* gene (class 1) in WT and  
690 *exo2Δ* cells. YAM2400 (WT) and YAM2402 (*exo2Δ*) cells were grown to mid-log phase in rich medium.  
691 Data normalization and presentation was as above. Cross-linking, chromatin extraction, data analysis  
692 and presentation were as described above. \* $p<0.05$ ; \*\* $p<0.01$ ; ns, not significant upon t-test.

693

694 **Fig 6. Role of Set2-dependent H3K36me3 in *ctt1* attenuation.**

695 **A.** Set2 is recruited to *ctt1* upon oxidative stress. YAM2816 (Set2-13Myc [60]) cells were grown as in  
696 Fig 2B. Cross-linking and chromatin extraction were as described in Fig 4. Data are presented as mean  
697  $\pm$  SEM, calculated from three biological replicates.

698 **B.** ChIP analysis of H3K36 trimethylation (me3) along *ctt1* in *exo2Δ* cells. Strains YAM2400 (WT) and  
699 YAM2402 (*exo2Δ*) were grown as in Fig 2B. Cross-linking and chromatin extraction were as described  
700 in Fig 4. Data analysis was performed as described in Fig 5C. Average values and SEM were calculated  
701 from three biological replicates. \*  $p < 0.05$ ; ns, not significant upon t-test.

702 **C.** Analysis of *XUT0794* level in *set2Δ* cells. Strains YAM2400 (WT), YAM2402 (*exo2Δ*) and YAM2797  
703 (*set2Δ*) were grown to mid-log phase in rich medium. *XUT0794* level was quantified from total RNA  
704 as described in Fig 2C. Data are presented as mean +/- SEM, calculated from three biological  
705 replicates. \*\*  $p < 0.01$ ; \*\*\*  $p < 0.001$ ; ns, not significant upon t-test.

706 **D.** Analysis of *ctt1* mRNA induction in *set2Δ* cells. Strains YAM2400 (WT), YAM2402 (*exo2Δ*) and  
707 YAM2797 (*set2Δ*) were grown as in Fig 2B. *ctt1* mRNA was quantified by strand-specific RT-qPCR as  
708 described in Fig 2C. Data are presented as above. \*\*\*  $p < 0.001$ ; ns, not significant upon t-test.

709

710 **Fig 7. Dicer controls *ctt1* induction independently of Exo2.**

711 **A.** Analysis of *ctt1* mRNA induction in WT, *exo2Δ*, *dcr1Δ* and *exo2Δ dcr1Δ* cells. Strains YAM2400  
712 (WT), YAM2402 (*exo2Δ*), YAM2406 (*dcr1Δ*) and YAM2404 (*exo2Δ dcr1Δ*) were grown as described in  
713 Fig 2B. *ctt1* mRNA was quantified by strand-specific RT-qPCR as described in Fig 2C. Data are  
714 presented as mean +/- SEM, calculated from three biological replicates. \*  $p < 0.05$ ; \*\*  $p < 0.01$ ; \*\*\*  $p <$   
715 0.001 upon t-test.

716 **B.** Analysis of *XUT0794* level in in WT, *exo2Δ*, *dcr1Δ* and *exo2Δ dcr1Δ* cells. Strains YAM2400 (WT),  
717 YAM2402 (*exo2Δ*), YAM2406 (*dcr1Δ*) and YAM2404 (*exo2Δ dcr1Δ*) were grown to mid-log phase in  
718 rich medium. *XUT0794* was quantified by strand-specific RT-qPCR as described in Fig 2C. Data are  
719 presented as mean +/- SEM, calculated from three biological replicates. \*\*  $p < 0.01$ ; \*\*\*  $p < 0.001$ ; ns,  
720 not significant upon t-test.

721 **C.** ChIP analysis of RNAPII occupancy across *ctt1* in *dcr1Δ* cells. Strains YAM2400 (WT) and YAM2406  
722 (*dcr1Δ*) were grown as in Fig 2B. Cross-linking, chromatin extraction and data analysis were as

723 described in Fig 4B. Data are presented as mean +/- SEM, calculated from three biological replicates.

724 ns, not significant upon t-test.

725 **D.** CHIP analysis of H4K5/8/12/16 acetylation (H4-acetyl) along *ctt1* in *dcr1Δ* cells. Strains YAM2400

726 (WT) and YAM2406 (*dcr1Δ*) were grown as in Fig 2B. Cross-linking and chromatin extraction were as

727 described in Fig 4B. Data analysis was performed as described in Fig 5C. Data are presented as mean

728 +/- SEM, calculated from three biological replicates. \*  $p < 0.05$ ; \*\*  $p < 0.01$  upon t-test.

729

730 **SUPPORTING INFORMATION LEGENDS**

731 **S1 Fig. Antisense XUT stabilization induces transcriptional attenuation of a class of highly**  
732 **expressed genes.**

733 **A.** Global RNAPII transcription in WT and *exo2Δ* cells. Density plot of *exo2Δ*/WT NET-Seq signal ratio  
734 for mRNAs (blue), sn(o)RNAs (black) and XUTs (red).

735 **B.** Metagene view of NET-Seq signals along class 1-4 genes in WT cells. For each class, normalized  
736 signal (tag/nt, log<sub>2</sub>) along mRNA transcription start site (TSS) +/- 1000 nt (sense strand) and the  
737 antisense (as) strand were piled up, in a strand-specific manner. Average signal for each strand was  
738 plotted for class 1 (red), 2 (blue), 3 (green) and 4 (black). The shading surrounding each line denotes  
739 the 95% confidence interval.

740 **C.** Box-plot of NET-Seq signal (tag/nt, log<sub>2</sub>) for XUTs antisense to class 1 and class 3 genes in WT and  
741 *exo2Δ* ( $\Delta$ ) cells.

742 **D.** Metagene view of nascent antisense transcription (NET-Seq) signal around the sense gene TSS of  
743 class 1-4 genes, in WT cells. The shading surrounding each line denotes the 95% confidence interval.

744 **E** Metagene of H3 levels for class 1-4 genes in WT cells. The analysis was performed using previously  
745 published ChIP-Seq data [30]. Metagene representation of signal for class 1 (red), class 2 (blue), class  
746 3 (green) and class 4 (black) was performed as above, in a strand-unspecific manner. The shading  
747 surrounding each line denotes the 95% confidence interval.

748 **F.** Metagene view of H3K14 acetylation for class 1-4 genes in WT cells. ChIP-Seq libraries construction  
749 and sequencing were previously described [30]. Metagene representation of signal for each class of  
750 genes was performed as above, using ratio of coverage (log<sub>2</sub>) for H3K14ac and H3.

751

752 **S2 Fig. Stabilization of *XUT0794* antisense to *ctt1* correlates with H<sub>2</sub>O<sub>2</sub> sensitivity in *exo2Δ* cells.**

753 **A.** Snapshot of total RNA-Seq signals along the *ctt1* locus in WT and *exo2Δ* cells. RNA-Seq data were  
754 previously published [30]. Densities (tag/nt) for the + and - strands are visualized in the upper and

755 lower panels, respectively. The signals for the WT and the *exo2Δ* strains are represented as black and  
756 grey lines, respectively.

757 **B.** Exo2-deficient cells display a slow growth phenotype. YAM2400 (WT) and YAM2402 (*exo2Δ*) cells  
758 were grown in rich (YES) medium, at 32°C. OD<sub>595</sub> was measured every hour. OD<sub>595</sub> at time 0 was set  
759 to 1, for each strain. Data are expressed in a log scale.

760 **C.** Loss of Exo2 confers sensitivity to hydrogen peroxide. Serial 1:10 dilutions of YAM2400 (WT) and  
761 YAM2402 (*exo2Δ*) cells were dropped on solid rich medium (YES) containing or not 2 mM H<sub>2</sub>O<sub>2</sub>.  
762 Plates were incubated at the indicated temperature for 3-4 days.

763

764 **S3 Fig. Effect of *XUT0794* overexpression in *cis* and in *trans*.**

765 **A.** Attenuation of *ctt1* mRNA upon overexpression of *XUT0794* in *cis*. Strains YAM2400 (WT) and  
766 YAM2474 (*P41nmt1-XUT0794*) were grown for 24 hours to mid-log phase in EMM medium +/- 15 μM  
767 thiamine, before addition of H<sub>2</sub>O<sub>2</sub> for 15 min. Levels of *XUT0794* (red) and *ctt1* mRNA (blue) were  
768 quantified from total RNA using strand-specific RT-qPCR and normalized on the level of the U3B  
769 snoRNA. Data are presented as mean +/- SEM from three biological replicates.

770 **B.** Induction of *ctt1* mRNA upon *XUT0794* overexpression in *trans*. YAM2475 (empty vector) and  
771 YAM2476 (*pAM353; P41nmt1-XUT0794*) cells were grown for 24 hours to mid-log phase in EMM-L  
772 medium, before addition of H<sub>2</sub>O<sub>2</sub> for 15 min. Determination of *XUT0794* and *ctt1* mRNA levels and  
773 data presentation are as above.

774

775 **S4 Fig. Transcription of *act1* is not controlled by an asXUT.**

776 Snapshot of total (input) and nascent (IP) NET-Seq signals along the *act1* gene in WT (upper panels)  
777 and *exo2Δ* (lower panels) cells. In each panel, the signal corresponding to the sense (+) and antisense  
778 (-) strand is shown in blue and pink, respectively. Blue arrows and boxes represent the mRNAs and  
779 coding sequences, respectively. NET-Seq data for the WT strain were previously described [30]. The  
780 snapshot was produced using VING [59].



781

782 **S5 Fig. Histone deacetylation in *exo2Δ* cells is specific of class 1.**

783 **A.** ChIP analysis of H3K14 acetylation along *ctt1*. Culture, cross-linking and chromatin extraction were  
784 as described in Fig 4B. For each position, data were first normalized on *act1*, then on the level of  
785 histone H3, immunoprecipitated from the same chromatin. Data are presented as mean +/- SEM,  
786 calculated from three biological replicates. \*  $p < 0.05$ ; \*\*  $p < 0.01$ ; ns, not significant upon t-test.

787 **B-C.** ChIP analysis of H4 K5/8/12/16 acetylation along the class 2 genes *cuf1* (**B**) and *ptb1* (**C**) in WT  
788 and *exo2Δ* cells. Cultures were as described in Fig 5D. Cross-linking, chromatin extraction, data  
789 analysis and presentation were as above. ns, not significant upon t-test.

790

791 **S6 Fig. Analysis of *ctt1* attenuation in HDAC mutants.**

792 **A.** Effect of the Clr3 class II HDAC. YAM2400 (WT), YAM2402 (*exo2Δ*), YAM2407 (*clr3Δ*) and YAM2444  
793 (*exo2Δ clr3Δ*) cells were grown in rich medium before (white) or after addition of 1 mM H<sub>2</sub>O<sub>2</sub> for 15  
794 minutes (black). *ctt1* mRNA levels were quantified by strand-specific RT-qPCR from total RNA as  
795 described in Fig 2C. Data are presented as mean +/- SEM from three biological replicates. \*  $p < 0.05$ ;  
796 \*\*  $p < 0.01$ ; ns, not significant upon t-test.

797 **B.** Effect of Hos2 class I HDAC. Same as above using YAM2400 (WT), YAM2402 (*exo2Δ*), YAM2471  
798 (*hos2Δ*) and YAM2472 (*exo2Δ hos2Δ*). \*  $p < 0.05$ ; \*\*\*  $p < 0.001$ ; ns, not significant upon t-test.

799 **C.** Effect of the Png2 subunit of the Clr6CI complex. Same as above using YAM2400 (WT), YAM2402  
800 (*exo2Δ*), YAM2561 (*png2Δ*) and YAM2562 (*exo2Δ png2Δ*). \*  $p < 0.05$ ; \*\*  $p < 0.01$ ; \*\*\*  $p < 0.001$ ; ns, not  
801 significant upon t-test.

802 **D.** Effect of Clr6 class I HDAC. Same as above using YAM2400 (WT), YAM2402 (*exo2Δ*), YAM2798  
803 (*clr6-1*) and YAM2814 (*clr6-1 exo2Δ*). \*  $p < 0.05$ ; \*\*\*  $p < 0.001$  upon t-test.

804 **E.** Effect of the Pst2 subunit of the Clr6CII complex. Same as above using YAM2400 (WT), YAM2402  
805 (*exo2Δ*) and YAM2815 (*pst2Δ*). \*  $p < 0.05$ ; \*\*  $p < 0.01$ ; \*\*\*  $p < 0.001$  upon t-test.

806

807 **S7 Fig. Dicer controls *ctt1* induction independently of Exo2.**

808 **A-C.** WT cells with pREP-nmt1/LEU2 empty vector (pDM829, vector), and *exo2* $\Delta$  cells with pREP-  
809 nmt1/LEU2 or pREPFLAG-Dcr1 (pDM914, Dcr1) plasmids [61] were grown to mid-log phase in EMM-  
810 Leu medium, before addition of H<sub>2</sub>O<sub>2</sub> for 15 min. *ctt1* mRNA (**A**), *XUT0794* (**B**) and *dcr1* mRNA (**C**)  
811 were quantified from total RNA using strand-specific RT-qPCR and normalized on the level of the U3B  
812 snoRNA. Average values and SEM were calculated from three biological replicates. \*\* $p < 0.01$ ;  
813 \*\*\* $p < 0.001$ ; ns, not significant upon t-test.

814 **D.** ChIP analysis of H3K36 trimethylation (H3K36me<sub>3</sub>) along *ctt1* in *dcr1* $\Delta$  cells. Strains YAM2400 (WT)  
815 and YAM2406 (*dcr1* $\Delta$ ) were grown as in Fig 2B. Cross-linking and chromatin extraction were as  
816 described in Fig 4B. Data analysis was performed as described in Fig 5C. Data are presented as mean  
817 +/- SEM, calculated from three biological replicates. ns, not significant upon t-test.

818

819 **S1 Table. List of class 1 genes.**

820 **S2 Table. List of class 2 genes.**

821 **S3 Table. List of class 3 genes.**

822 **S4 Table. List of class 4 genes.**

823 **S5 Table. Yeast strains.**

824 **S6 Table. Oligonucleotides.**

A

| Class | asXUT | # of genes | Nascent RNA levels in <i>exo2Δ</i> |
|-------|-------|------------|------------------------------------|
| 1     | +     | 175        | Down                               |
| 2     | -     | 548        | Down                               |
| 3     | +     | 910        | Unchanged                          |
| 4     | -     | 3495       | Unchanged                          |

B

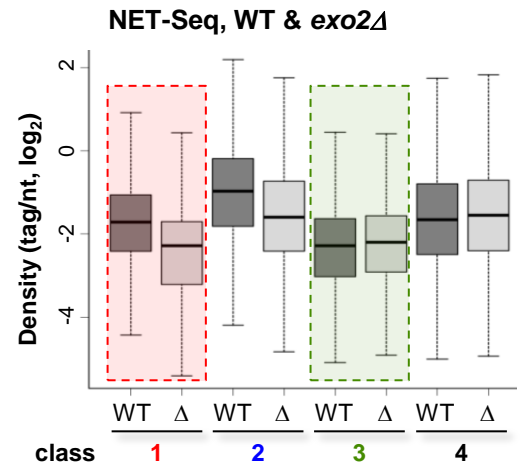

C

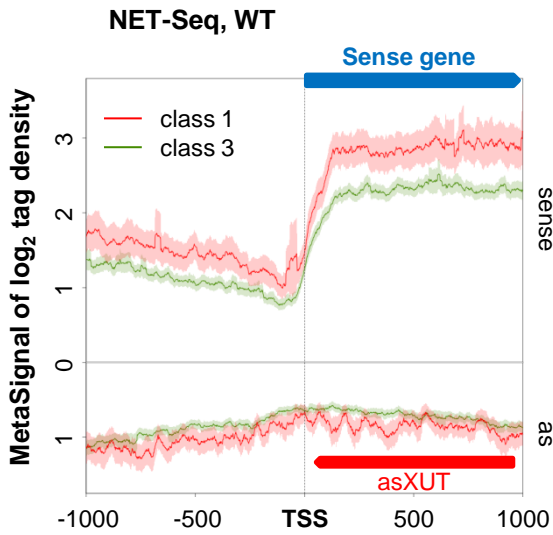

D

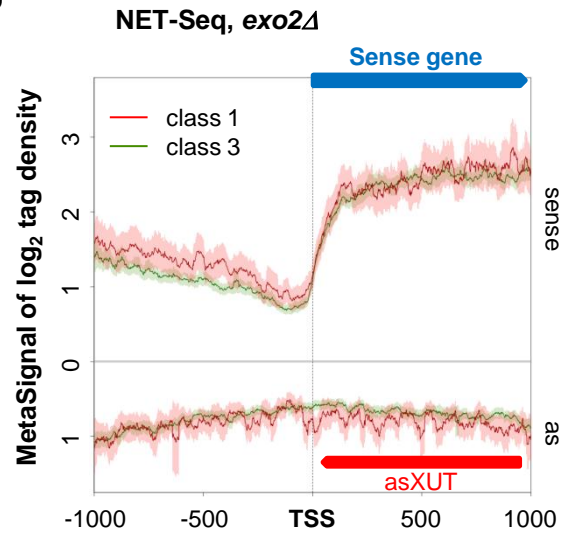

E

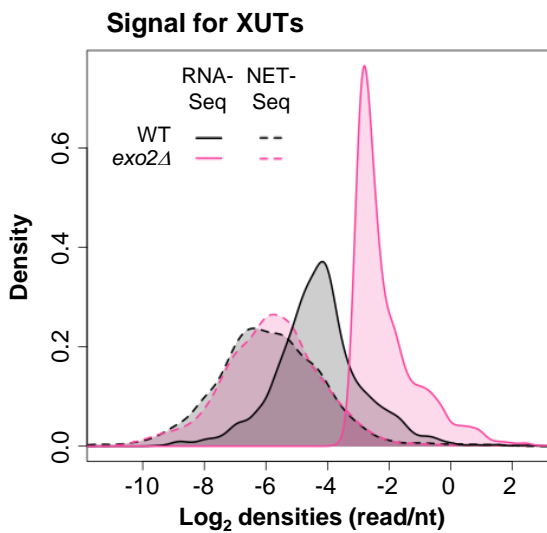

F

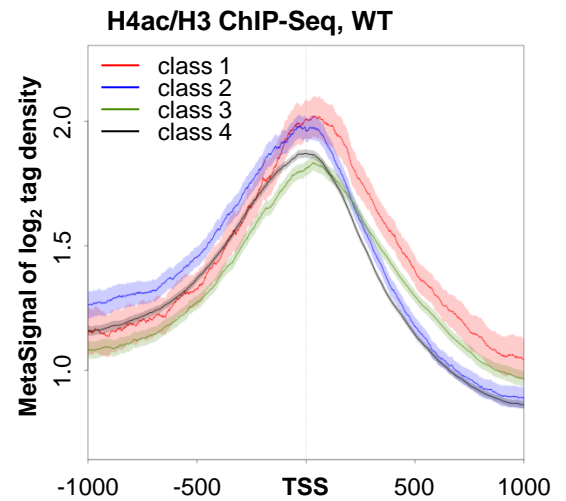

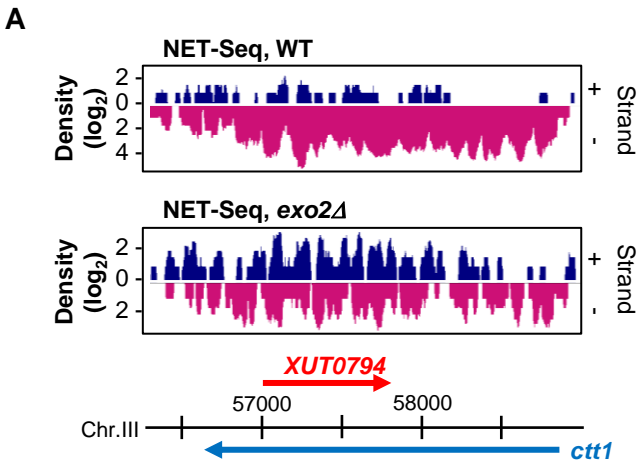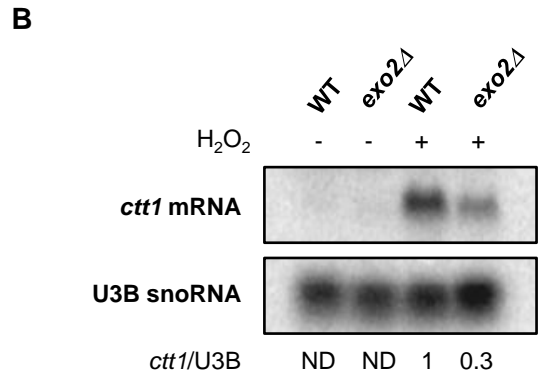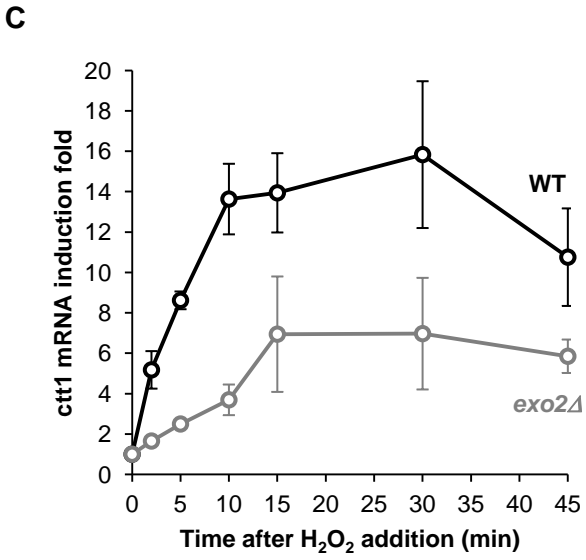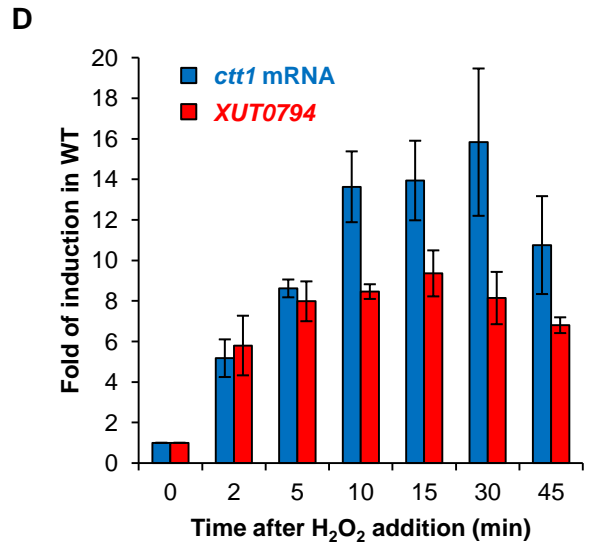

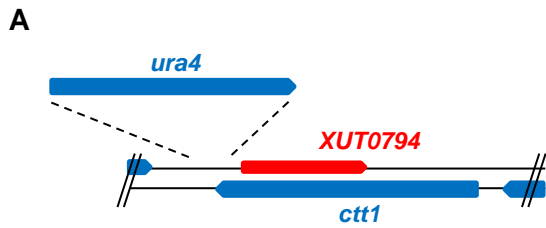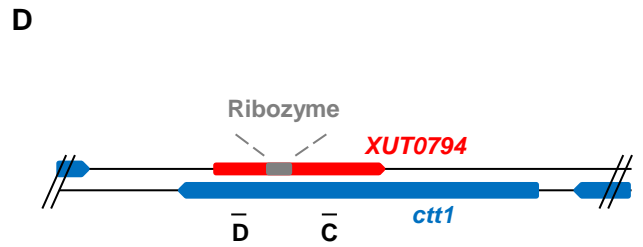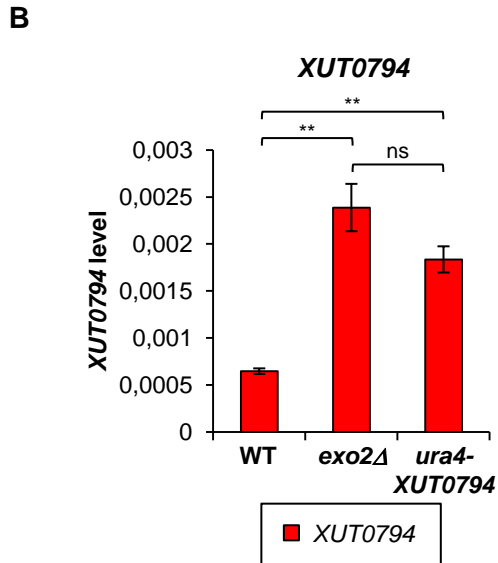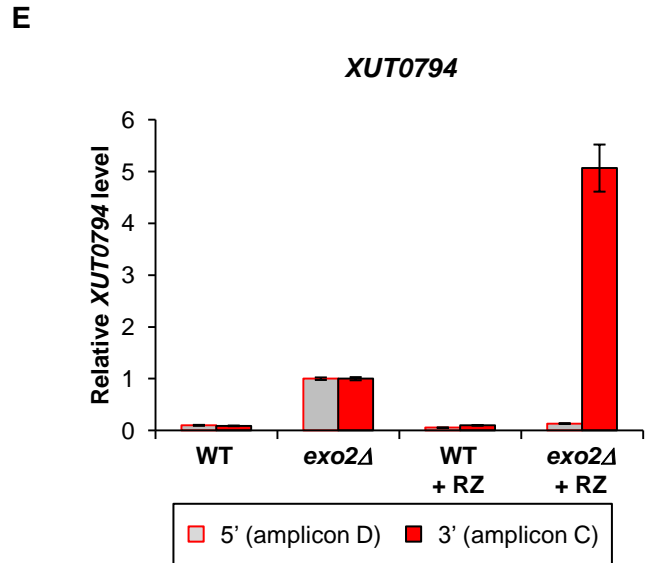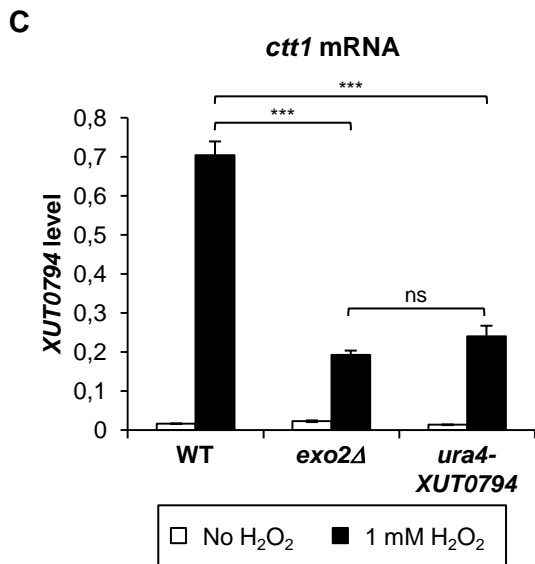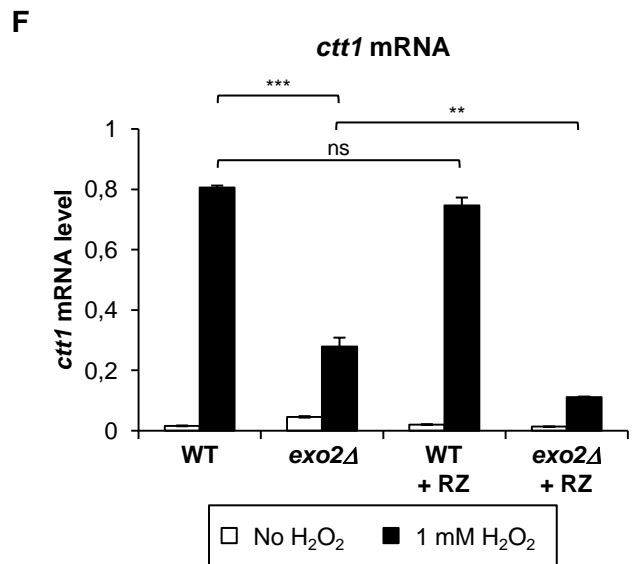

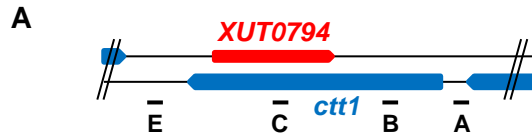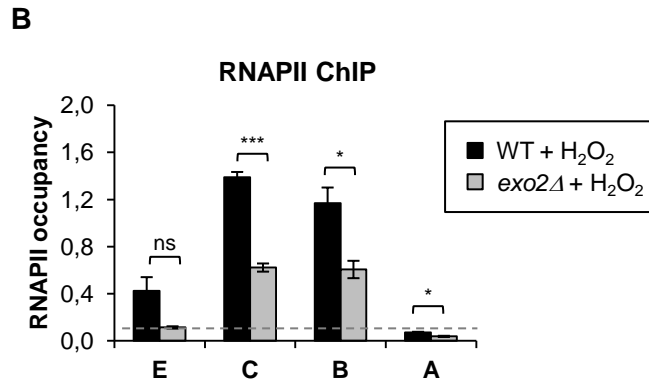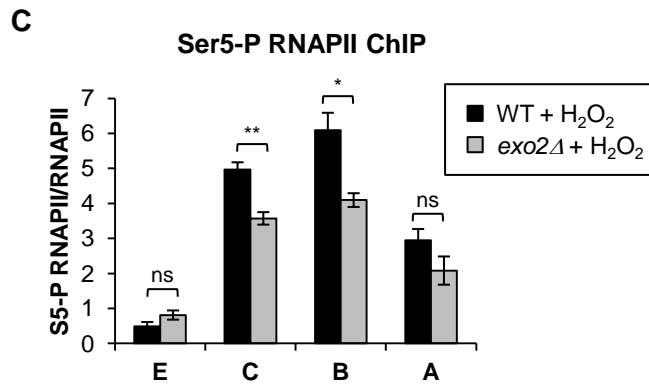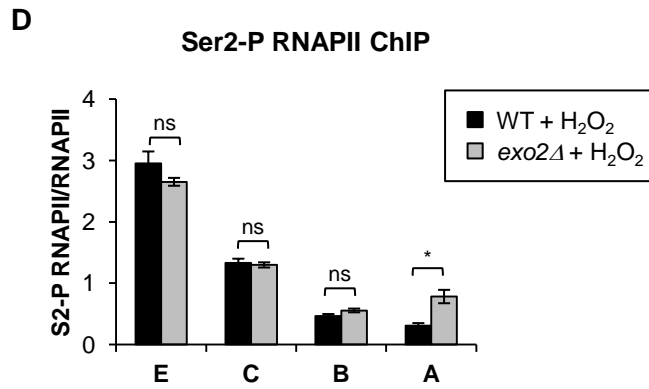

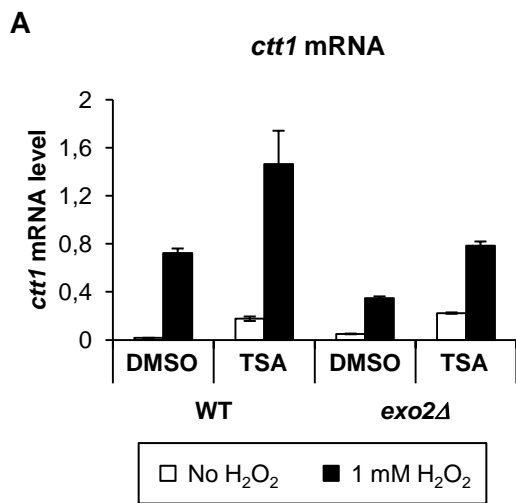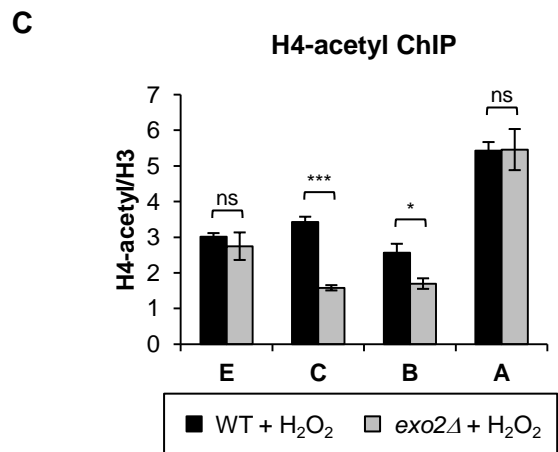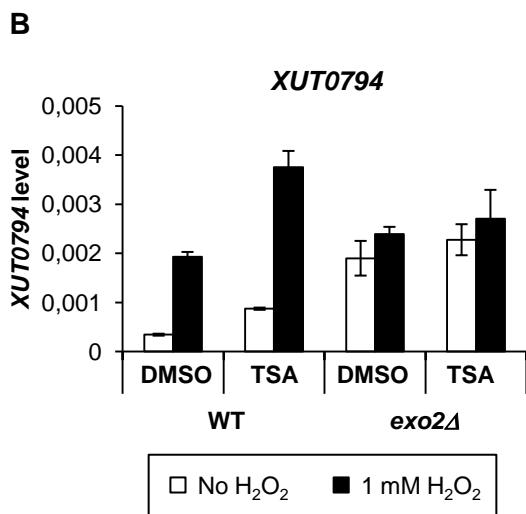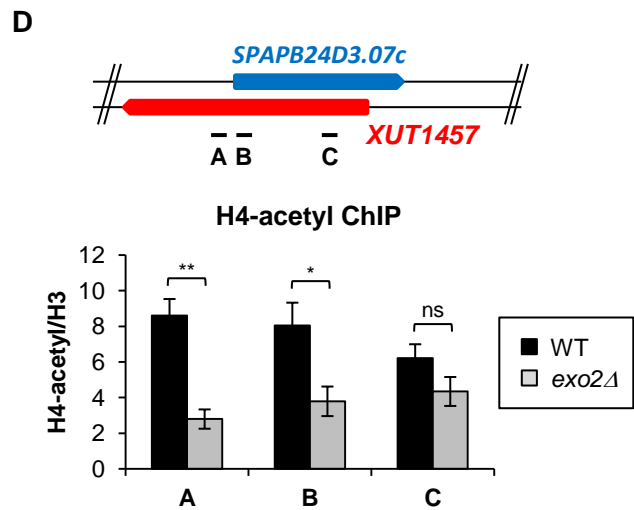

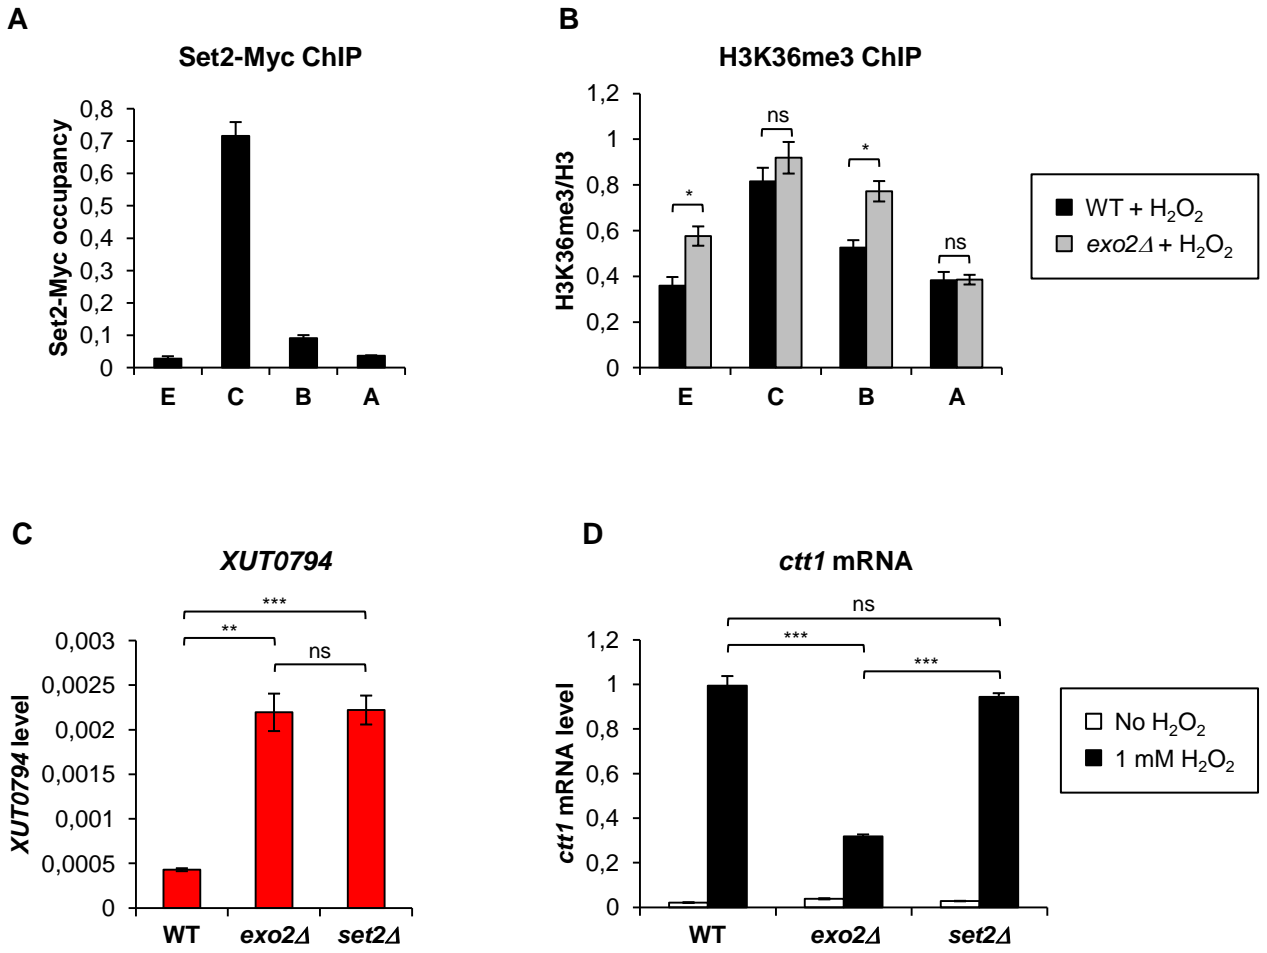



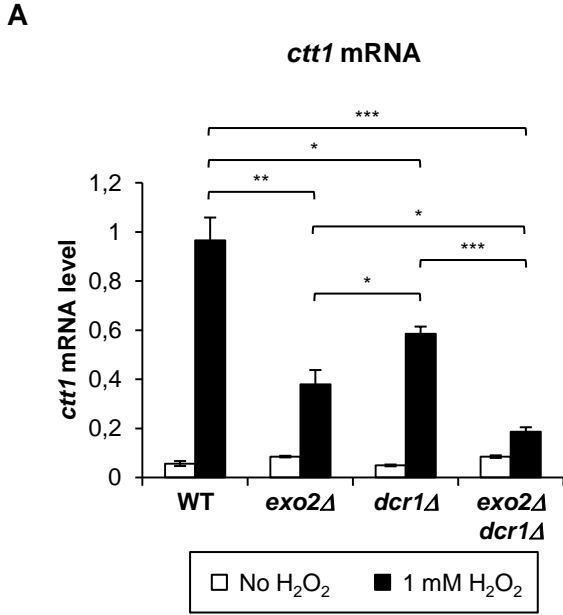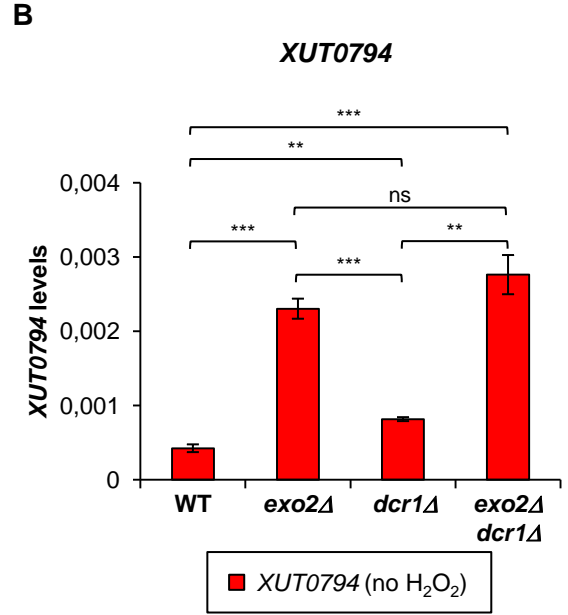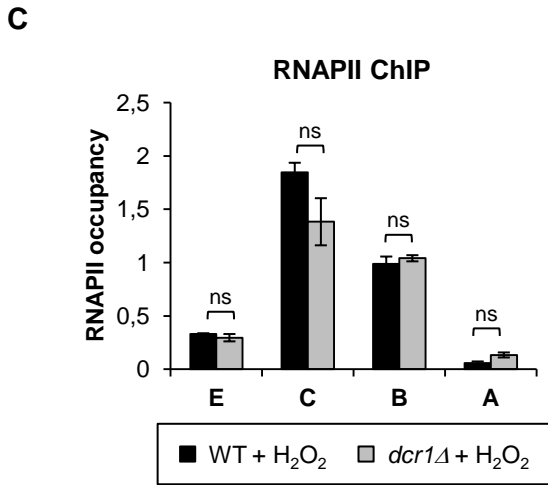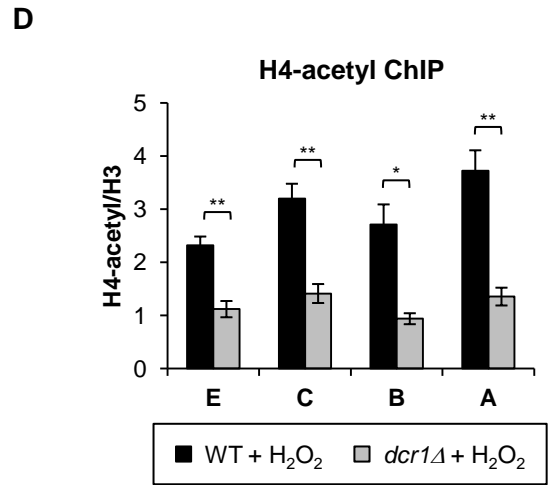

Source: https://www.biorxiv.org/content/10.1101/220707v2.full.pdf
